# Supplementary material for: Ring-opening polymerization of rac-lactide mediated by tetrametallic lithium and sodium diamino-bis(phenolate) complexes
Source: Royal Society of Chemistry journal article supplement (doi:10.1039/c5dt03119b), 2015-01-01
Supplement: c5dt03119b1.pdf [file c5dt03119b1.pdf]

Electronic Supplementary Information

## Ring-opening polymerization of *rac*-lactide mediated by tetrametallic lithium and sodium diamino-bis(phenolate) complexes

Dalal Alhashmialameer,<sup>a</sup> Nduka Ikpo,<sup>a</sup> Julie Collins,<sup>b</sup> Louise N. Dawe,<sup>abc</sup> Karen Hattenhauer,<sup>a</sup> and Francesca M. Kerton<sup>\*a</sup>

<sup>a</sup> Department of Chemistry, Memorial University of Newfoundland, St. John's, Newfoundland, Canada A1B 3X7. E-mail: [fkerton@mun.ca](mailto:fkerton@mun.ca)

<sup>b</sup> C-CART X-ray Diffraction Laboratory, Memorial University of Newfoundland, St. John's, Newfoundland.

<sup>c</sup> Current Address: Department of Chemistry, Wilfrid Laurier University, Waterloo, Ontario, Canada.

|                                                                                                                                                                                                                                                                                                      |     |
|------------------------------------------------------------------------------------------------------------------------------------------------------------------------------------------------------------------------------------------------------------------------------------------------------|-----|
| Table S1. Crystallographic data and structure refinement for <b>1</b> and <b>4</b> .                                                                                                                                                                                                                 | S3  |
| Table S2. Selected Bond lengths (Å) and angles (°) for <b>1</b> and <b>4</b> .                                                                                                                                                                                                                       | S4  |
| Figure S1. <sup>1</sup> H NMR spectrum (300 MHz, 298 K, C <sub>6</sub> D <sub>6</sub> ) of <b>1</b> .                                                                                                                                                                                                | S5  |
| Figure S2. <sup>1</sup> H NMR spectrum (500 MHz, 298 K, C <sub>6</sub> D <sub>6</sub> and C <sub>5</sub> D <sub>5</sub> N ) of <b>1</b> .                                                                                                                                                            | S6  |
| Figure S3. <sup>1</sup> H NMR spectrum (500 MHz, 298 K, C <sub>5</sub> D <sub>5</sub> N) of <b>1</b> .                                                                                                                                                                                               | S7  |
| Figure S4. <sup>7</sup> Li NMR spectrum (300 MHz, 298 K, C <sub>6</sub> D <sub>6</sub> ) of <b>4</b> .                                                                                                                                                                                               | S8  |
| Figure S5. <sup>1</sup> H NMR spectrum (300 MHz, 298 K, C <sub>6</sub> D <sub>6</sub> ) of <b>4</b> .                                                                                                                                                                                                | S9  |
| Figure S6a. <sup>1</sup> H NMR spectrum (500 MHz, 233 K, C <sub>5</sub> D <sub>5</sub> N) of <b>4</b> .                                                                                                                                                                                              | S10 |
| Figure S6b. <sup>1</sup> H NMR spectrum (500 MHz, 308 K, C <sub>5</sub> D <sub>5</sub> N) of <b>4</b> .                                                                                                                                                                                              | S11 |
| Figure S7. Conversion (%) vs. time for the ROP of LA initiated by <b>3</b> under the conditions in Table 1, entry 9.                                                                                                                                                                                 | S12 |
| Figure S8. Conversion (%) vs. time for the ROP of LA initiated by <b>3</b> under the conditions in Table 2, entries 13, 15 and 17. CH <sub>2</sub> Cl <sub>2</sub> , Toluene, THF.                                                                                                                   | S12 |
| Figure S9. First-order plot of LA consumption initiated by <b>3</b> according to the conditions in Table 2, entries 13 and 15. CH <sub>2</sub> Cl <sub>2</sub> ( $y = 0.0256x + 0.1897$ , $R^2 = 0.9894$ ), Toluene ( $y = 0.0884x + 0.3487$ , $R^2 = 0.9593$ ).                                     | S13 |
| Figure S10. Conversion (%) vs. time for the ROP of LA initiated by <b>1</b> , <b>2</b> , <b>3</b> and <b>4</b> in CH <sub>2</sub> Cl <sub>2</sub> under the conditions in Table 2, entries 2, 8, 13 and 19. <b>1</b> , <b>2</b> , <b>3</b> , <b>4</b> .                                              | S13 |
| Figure S11. First-order plot of LA consumption initiated by <b>1</b> , <b>2</b> , <b>3</b> and <b>4</b> in CH <sub>2</sub> Cl <sub>2</sub> under conditions in Table 2, entries 2, and 13. <b>1</b> ( $y = 0.0114x + 0.0834$ , $R^2 = 0.96$ ), <b>3</b> ( $y = 0.0257x + 0.2068$ , $R^2 = 0.9983$ ). | S14 |
| Figure S12. Conversion (%) vs. time for the ROP of LA initiated by <b>1</b> in CH <sub>2</sub> Cl <sub>2</sub> under the conditions in Table 2, entries 2, 3 and 5. <b>1 eq. BnOH</b> , <b>2 eq. BnOH</b> , <b>4 eq. BnOH</b> .                                                                      | S14 |
| Figure S13. <sup>1</sup> H NMR spectrum in CDCl <sub>3</sub> of PLA obtained under the conditions in Table 2, entry 12, similar spectra also obtained for entries 13, 18 and 19.                                                                                                                     | S15 |

|                                                                                                                                                                                                                         |     |
|-------------------------------------------------------------------------------------------------------------------------------------------------------------------------------------------------------------------------|-----|
| Figure S14. $^1\text{H}$ NMR spectrum in $\text{CDCl}_3$ of PLA obtained under the conditions in Table 2, entry 3, similar spectrum obtained for entry 5.                                                               | S16 |
| Figure S15. $^1\text{H}\{^1\text{H}\}$ NMR spectrum (500 MHz, $\text{CDCl}_3$ ) of the methine region of PLA produced under the conditions in Table 2, entry 7, similar results were obtained for entries 8, 12 and 13. | S17 |
| Figure S16. $^{13}\text{C}$ NMR spectrum (500 MHz, $\text{CDCl}_3$ ) of the methine region of PLA produced under the conditions in Table 2, entry 7, similar results were obtained for entries 8, 12 and 13.            | S17 |
| Figure S17. $^7\text{Li}$ NMR spectrum (300 MHz, $\text{C}_6\text{D}_6$ ) of <b>1</b> with and without 1 equiv. <i>rac</i> -lactide.                                                                                    | S18 |
| Figure S18. Monitoring of stoichiometric (M: BnOH: LA, 1:1 and 1:1:1) model reactions by $^1\text{H}$ NMR in dichloromethane- $\text{d}_2$ at 298 K (500 MHz).                                                          | S19 |
| Figure S19. Monitoring of stoichiometric (M: BnOH: LA, 1:2 and 1:2:1) model reactions by $^1\text{H}$ NMR in dichloromethane- $\text{d}_2$ at 298 K (500 MHz).                                                          | S20 |
| Figure S20. Monitoring of stoichiometric (M: BnOH: LA, 1:4 and 1:4:1) model reactions by $^1\text{H}$ NMR in dichloromethane- $\text{d}_2$ at 298 K (500 MHz).                                                          | S21 |
| Figure S21. $^{13}\text{C}$ NMR spectrum (300 MHz, 298 K, $\text{CDCl}_3$ ) of <b>1</b> .                                                                                                                               | S22 |
| Figure S22. $^{13}\text{C}$ NMR spectrum (300 MHz, 298 K, $\text{C}_6\text{D}_6$ ) of <b>1</b> .                                                                                                                        | S23 |
| Figure S23. $^{13}\text{C}$ NMR spectrum (300 MHz, 298 K, $\text{C}_5\text{D}_5\text{N}$ ) of <b>1</b> .                                                                                                                | S24 |
| Figure S24. MALDI-TOF spectrum of <b>1</b> .                                                                                                                                                                            | S25 |
| Figure S25. Theoretical and Experimental MALDI-TOF MS isotopic distribution pattern for <b>1</b> .                                                                                                                      | S25 |
| Figure S26. $^1\text{H}$ NMR spectrum (300 MHz, 298 K, $\text{C}_6\text{D}_6$ ) of <b>2</b> .                                                                                                                           | S26 |
| Figure S27. $^{13}\text{C}$ NMR spectrum (300 MHz, 298 K, $\text{C}_5\text{D}_5\text{N}$ ) of <b>2</b> .                                                                                                                | S27 |
| Figure S28. $^{13}\text{C}$ NMR spectrum (300 MHz, 298 K, $\text{CDCl}_3$ ) of <b>2</b> .                                                                                                                               | S28 |
| Figure S29. MALDI-TOF spectrum of <b>2</b> .                                                                                                                                                                            | S29 |
| Figure S30. Theoretical and Experimental MALDI-TOF MS isotopic distribution pattern for <b>2</b> .                                                                                                                      | S29 |
| Figure S31. $^1\text{H}$ NMR spectrum (300 MHz, 298 K, $\text{C}_6\text{D}_6$ ) of <b>3</b> .                                                                                                                           | S30 |
| Figure S32. $^{13}\text{C}$ NMR spectrum (300 MHz, 298 K, $\text{C}_6\text{D}_6$ ) of <b>3</b> .                                                                                                                        | S31 |
| Figure S33. MALDI-TOF spectrum of <b>3</b> .                                                                                                                                                                            | S32 |
| Figure S34. Theoretical and Experimental MALDI-TOF MS isotopic distribution pattern for <b>3</b> .                                                                                                                      | S32 |
| Figure S35. $^{13}\text{C}$ NMR spectrum (300 MHz, 298 K, $\text{CDCl}_3$ ) of <b>4</b> .                                                                                                                               | S33 |
| Figure S36. MALDI-TOF spectrum of <b>4</b> .                                                                                                                                                                            | S34 |

Table S1. Crystallographic data and structure refinement for **1** and **4**.

| Compound                                    | <b>1</b> (CCDC 1410026)                                                                                                     | <b>4</b> (CCDC 1410027)                                                                                              |
|---------------------------------------------|-----------------------------------------------------------------------------------------------------------------------------|----------------------------------------------------------------------------------------------------------------------|
| Empirical Formula                           | C <sub>82</sub> H <sub>132</sub> Li <sub>4</sub> N <sub>4</sub> O <sub>7</sub> ·3(C <sub>7</sub> H <sub>8</sub> )           | C <sub>66</sub> H <sub>100</sub> Na <sub>4</sub> N <sub>4</sub> O <sub>6</sub>                                       |
| Formula Weight                              | 1590.15                                                                                                                     | 1137.51                                                                                                              |
| Temperature/K                               | 163                                                                                                                         | 163                                                                                                                  |
| Crystal Color                               | Colorless                                                                                                                   | Colorless                                                                                                            |
| Crystal System                              | Triclinic                                                                                                                   | Monoclinic                                                                                                           |
| Crystal Dimensions                          | 0.38 X 0.35 X 0.34 mm                                                                                                       | 0.5 × 0.43 × 0.35 mm                                                                                                 |
| Lattice Parameters                          | a = 16.592(2) Å<br>b = 18.655(2) Å<br>c = 19.067(2) Å<br>α = 103.219(7)°<br>β = 98.581(7)°<br>V = 5265.8(10) Å <sup>3</sup> | a = 12.898(4) Å<br>b = 13.741(4) Å<br>c = 18.695(6) Å<br>α = 90°<br>β = 101.518(4)°<br>V = 3246.7(17) Å <sup>3</sup> |
| Space Group                                 | P-1 (#2)                                                                                                                    | P2 <sub>1</sub> /n                                                                                                   |
| Z value                                     | 2                                                                                                                           | 2                                                                                                                    |
| D <sub>calc</sub>                           | 1.003 g/cm <sup>3</sup>                                                                                                     | 1.164 g/cm <sup>3</sup>                                                                                              |
| F <sub>000</sub>                            | 1740                                                                                                                        | 1232.0                                                                                                               |
| μ(MoKα)                                     | 0.61 cm <sup>-1</sup>                                                                                                       | 0.096 cm <sup>-1</sup>                                                                                               |
| Reflections collected                       | 43063                                                                                                                       | 24304                                                                                                                |
| Independent reflections                     | 21429                                                                                                                       | 7155                                                                                                                 |
| R <sub>int</sub>                            | 0.0454                                                                                                                      | 0.0374                                                                                                               |
| R, wR <sub>2</sub> (all) <sup>a</sup>       | 0.1462, 0.3597                                                                                                              | 0.0604, 0.1653                                                                                                       |
| R, wR <sub>2</sub> [I ≥ 2σ(I)] <sup>a</sup> | 0.1130, 0.3441                                                                                                              | 0.0543, 0.1580                                                                                                       |
| GOF-fit on F <sup>2</sup>                   | 1.060                                                                                                                       | 1.084                                                                                                                |

$$^a R_1 = \Sigma(|F_o| - |F_c|) / \Sigma|F_o| ; wR_2 = [ \Sigma(w(F_o^2 - F_c^2)^2) / \Sigma w(F_o^2)^2 ]^{1/2}$$

Table S2. Selected Bond lengths (Å) and angles (°) for **1** and **4**.

| <b>1</b>         |          | <b>4</b>        |            |
|------------------|----------|-----------------|------------|
| Li(1)-O(1)       | 1.804(8) | Na(1)-O(1)      | 2.3450(14) |
| Li(2)-O(1)       | 1.932(7) | Na(1)-O(2)      | 2.3176(14) |
| Li(1)-O(3)       | 1.849(8) | Na(1)-O(4)      | 2.3956(13) |
| Li(2)-O(3)       | 1.924(7) | Na(1)-N(2)      | 2.6392(16) |
| Li(1)-O(5)       | 1.932(8) | Na(2)-O(4)      | 2.1825(14) |
| Li(2)-N(1)       | 2.268(8) | Na(2)-O(2)      | 2.2369(17) |
| Li(2)-N(3)       | 2.295(7) | Na(1)-N(1)      | 2.6761(16) |
| O(1)-Li(1)-O(3)  | 100.0(4) | O(1)-Na(1)-O(4) | 89.16(4)   |
| O1-Li(1)-O(3)    | 130.5(4) | O(1)-Na(1)-N(2) | 134.44(5)  |
| O(1)-Li(2)-O(3)  | 93.0(3)  | O(4)-Na(1)-N(2) | 123.34(5)  |
| Li(1)-O(1)-Li(2) | 50.3(2)  | O(1)-Na(1)-N(1) | 77.30(4)   |
| Li(1)-O(3)-Li(2) | 50.0(2)  | O(2)-Na(1)-O(4) | 92.48(5)   |
| O(1)-Li(2)-N(1)  | 95.5(3)  | O(2)-Na(1)-N(2) | 77.34(5)   |
| O(1)-Li(2)-N(3)  | 123.4(3) | O(2)-Na(1)-N(1) | 139.96(5)  |
| O(3)-Li(2)-N(1)  | 118.7(3) | N(1)-Na(1)-N(2) | 62.65(5)   |
| O(3)-Li(2)-N(3)  | 94.3(3)  | O(2)-Na(1)-O(4) | 35.63(4)   |
| N(1)-Li(2)-N(3)  | 128.0(3) |                 |            |

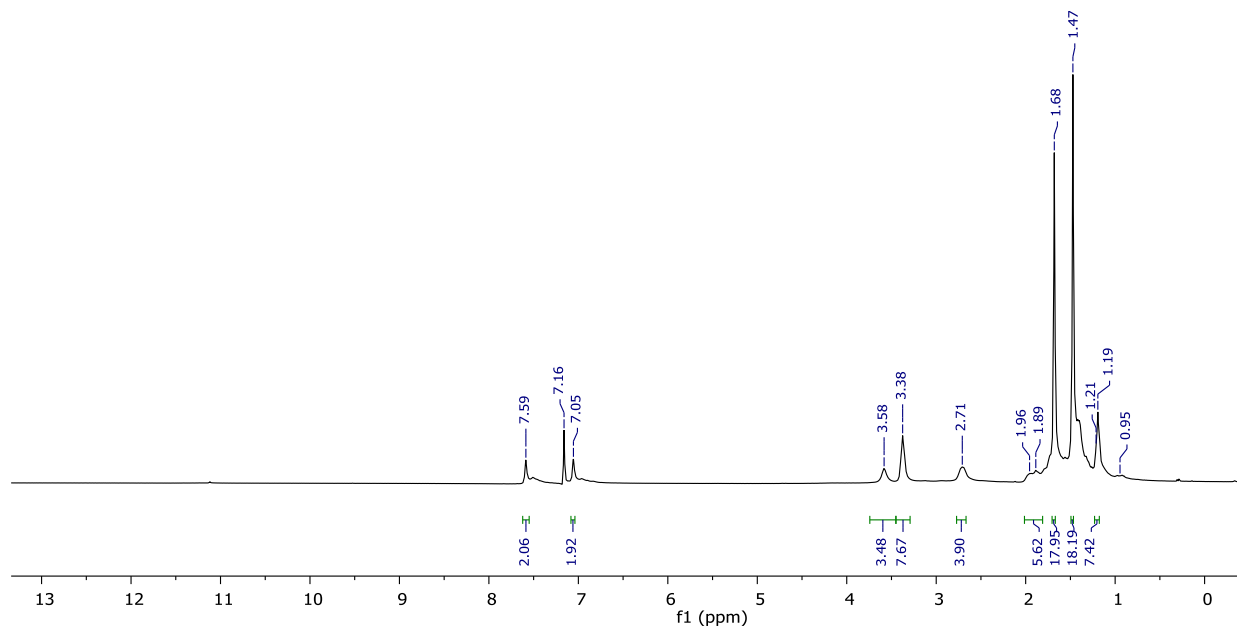

Figure S1.  $^1\text{H}$  NMR spectrum (300 MHz, 298 K,  $\text{C}_6\text{D}_6$ ) of **1**.

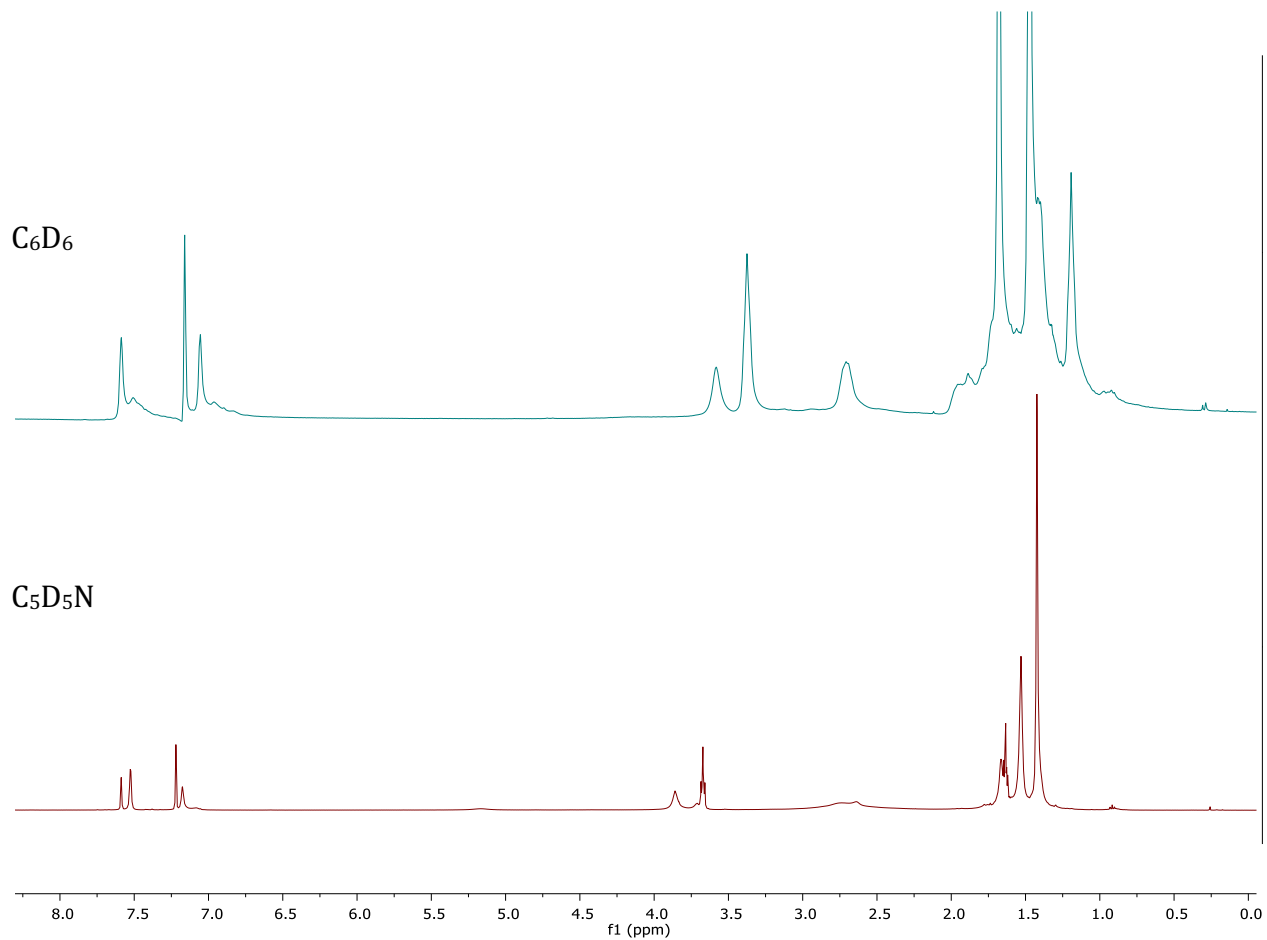

Figure S2.  $^1\text{H}$  NMR spectrum (500 MHz, 298 K,  $\text{C}_6\text{D}_6$  and  $\text{C}_5\text{D}_5\text{N}$ ) of **1**.

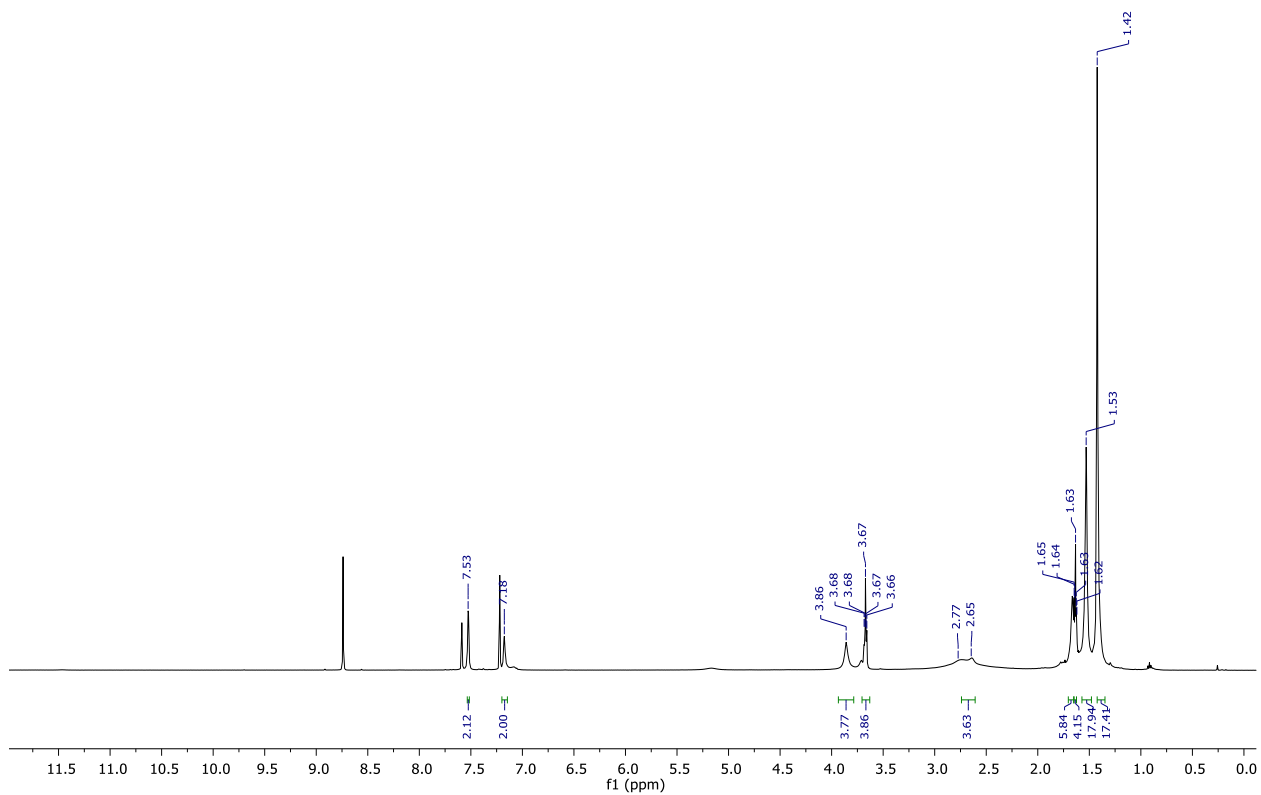

Figure S3.  $^1\text{H}$  NMR spectrum (500 MHz, 298 K,  $\text{C}_5\text{D}_5\text{N}$ ) of **1**.

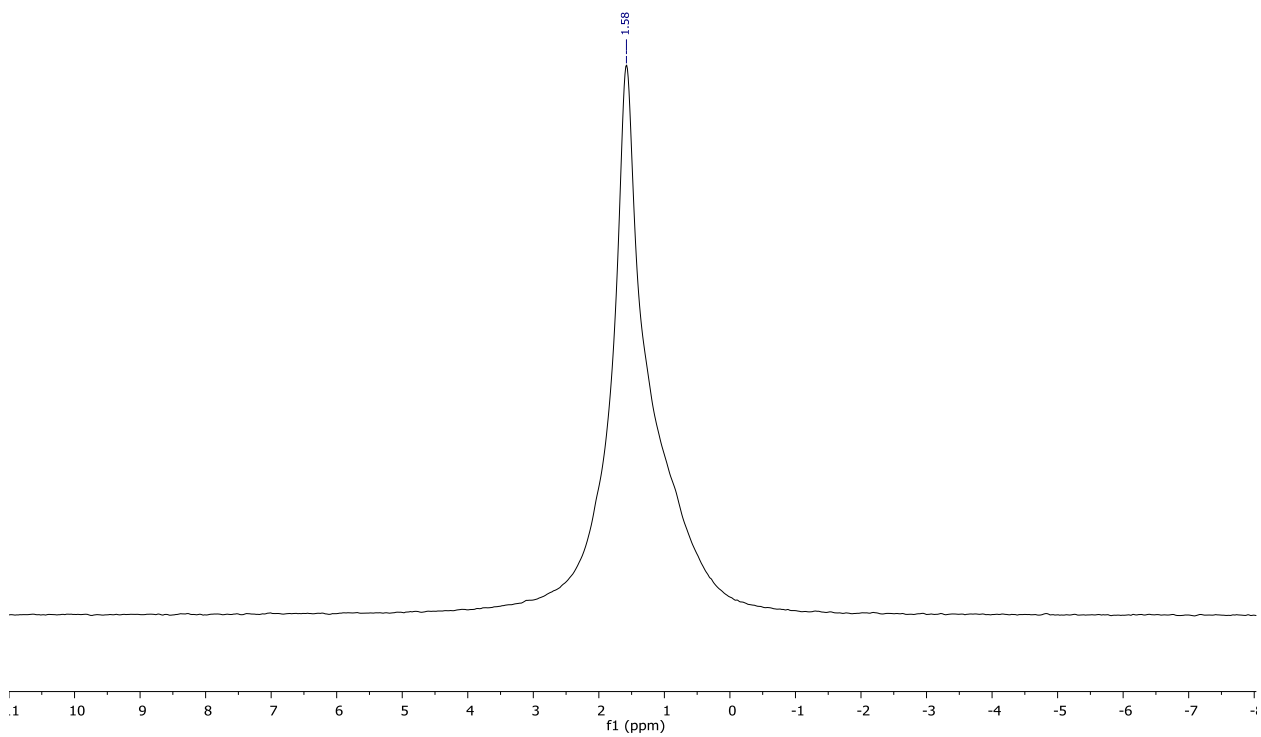

Figure S4.  $^7\text{Li}$  NMR spectrum (300 MHz, 298 K,  $\text{C}_6\text{D}_6$ ) of **1**.



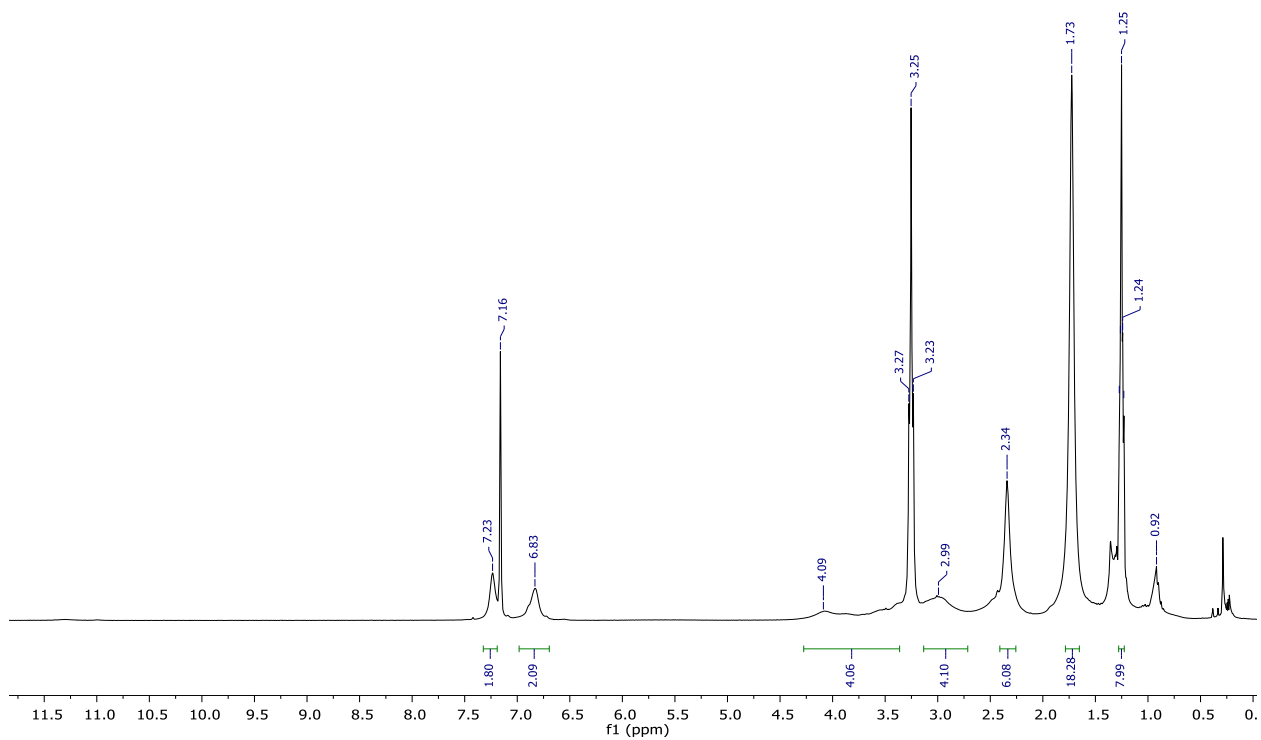

Figure S5.  $^1\text{H}$  NMR spectrum (300 MHz, 298 K,  $\text{C}_6\text{D}_6$ ) of **4**.

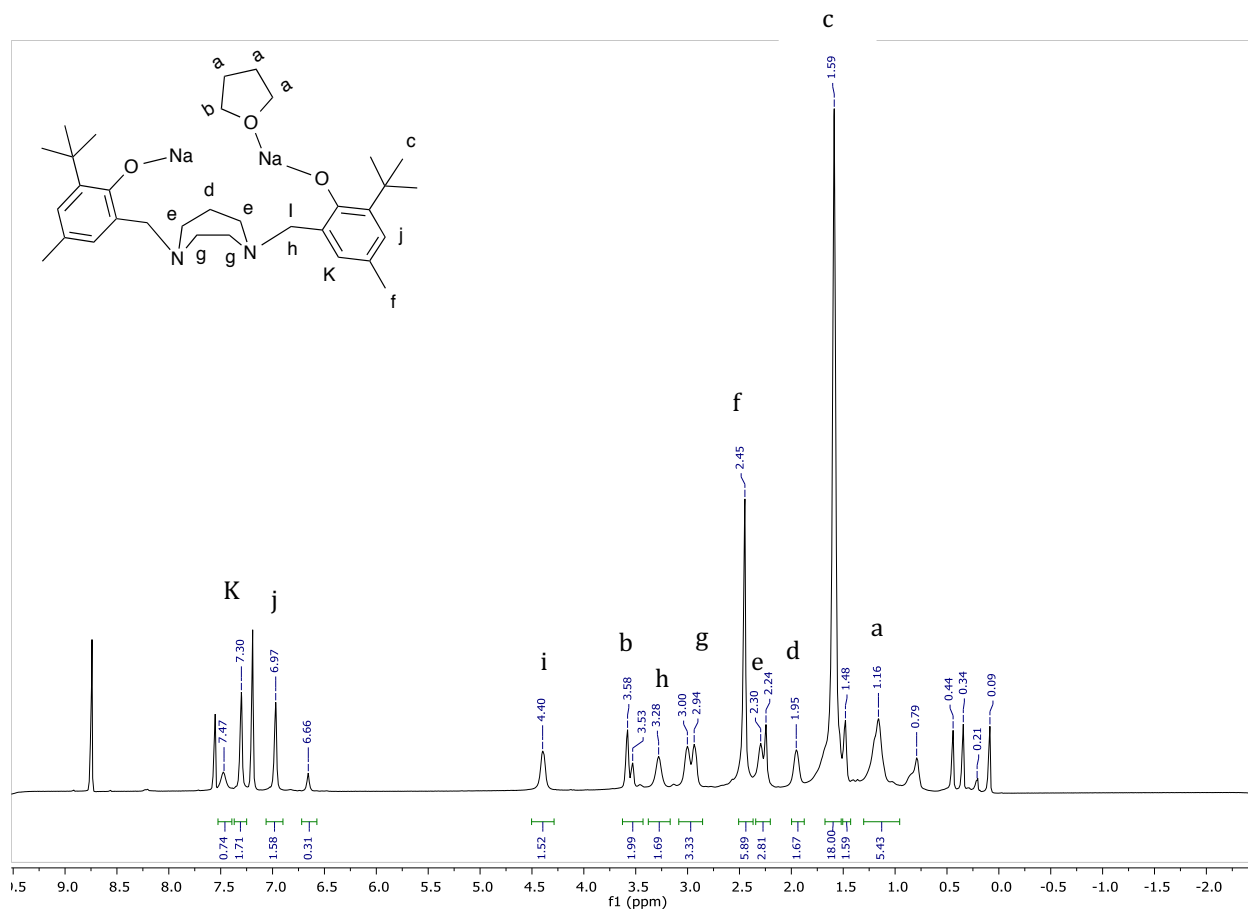

Figure S6a. <sup>1</sup>H NMR spectrum (500 MHz, 233 K, C<sub>5</sub>D<sub>5</sub>N) of 4.

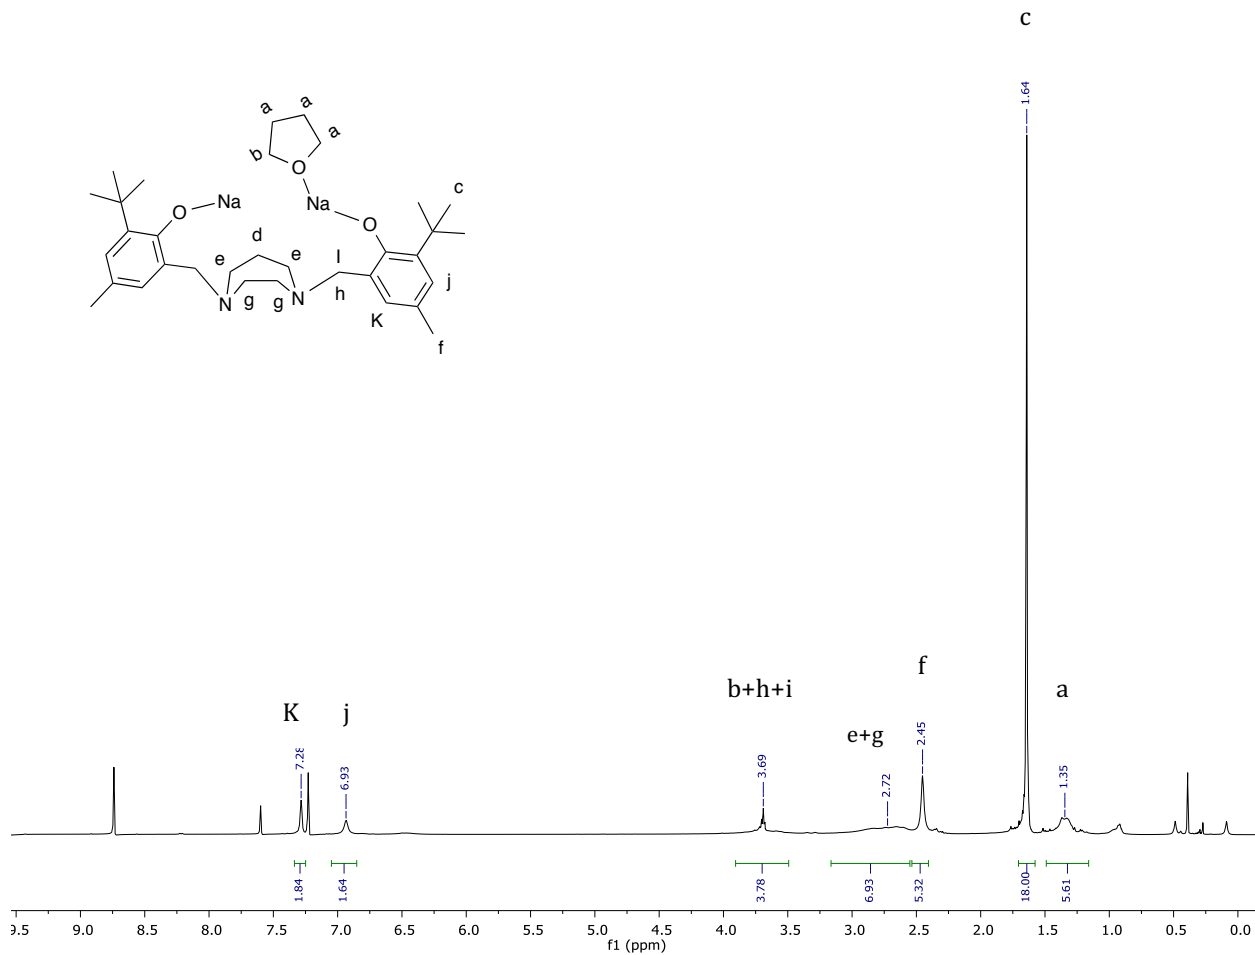

Figure S6b. <sup>1</sup>H NMR spectrum (500 MHz, 308 K, C<sub>5</sub>D<sub>5</sub>N) of 4.

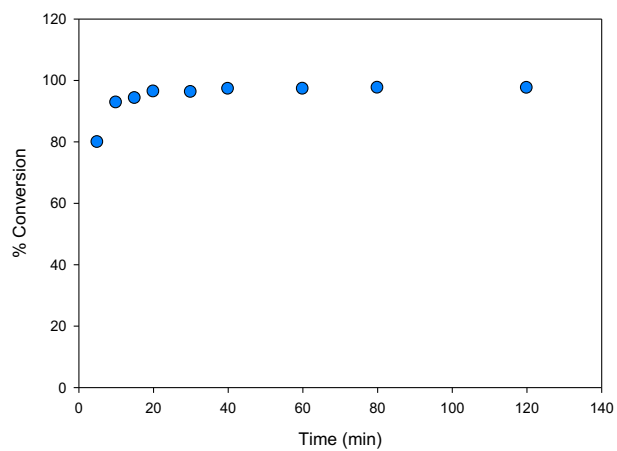

Figure S7. Conversion (%) vs. time for the ROP of LA initiated by **3** under the conditions in Table 1, entry 9.

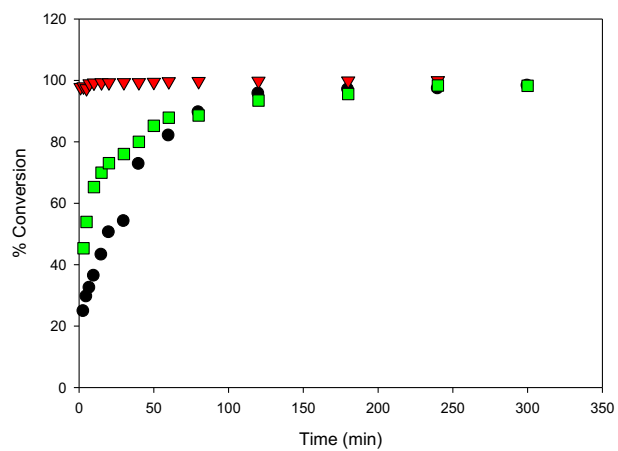

Figure S8. Conversion (%) vs. time for the ROP of LA initiated by **3** under the conditions in Table 2, entries 13, 15 and 17. CH<sub>2</sub>Cl<sub>2</sub>, Toluene, THF.

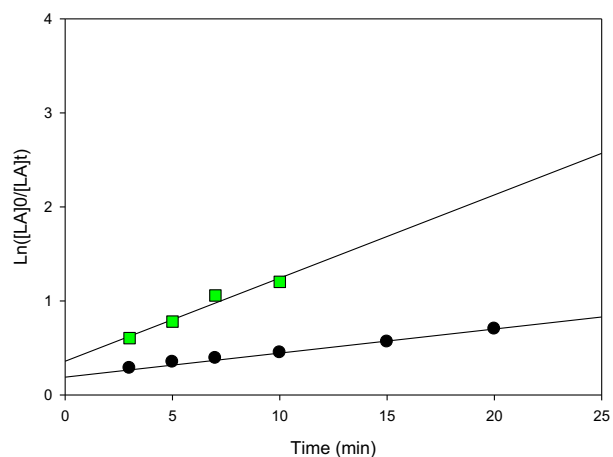

Figure S9. First-order plot of LA consumption initiated by **3** according to the conditions in Table 2, entries 13 and 15.  $\text{CH}_2\text{Cl}_2$  ( $y = 0.0256x + 0.1897$ ,  $R^2 = 0.9894$ ), Toluene ( $y = 0.0884x + 0.3487$ ,  $R^2 = 0.9593$ ).

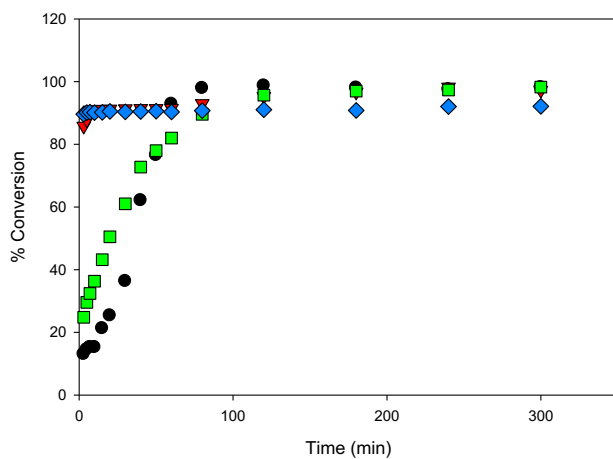

Figure S10. Conversion (%) vs. time for the ROP of LA initiated by **1**, **2**, **3** and **4** in  $\text{CH}_2\text{Cl}_2$  under the conditions in Table 2, entries 2, 8, 13 and 19. **1**, **2**, **3**, **4**.

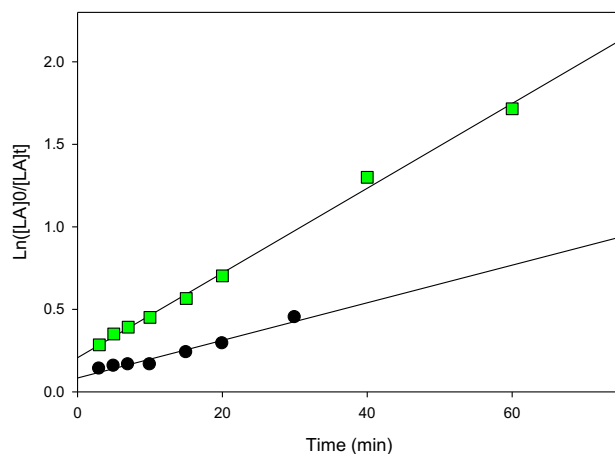

Figure S11. First-order plot of LA consumption initiated by **1**, **2**, **3** and **4** in  $\text{CH}_2\text{Cl}_2$  under the conditions in Table 2, entries 2, and 13. **1** ( $y = 0.0114x + 0.0834$ ,  $R^2 = 0.96$ ), **3** ( $y = 0.0257x + 0.2068$ ,  $R^2 = 0.9983$ ).

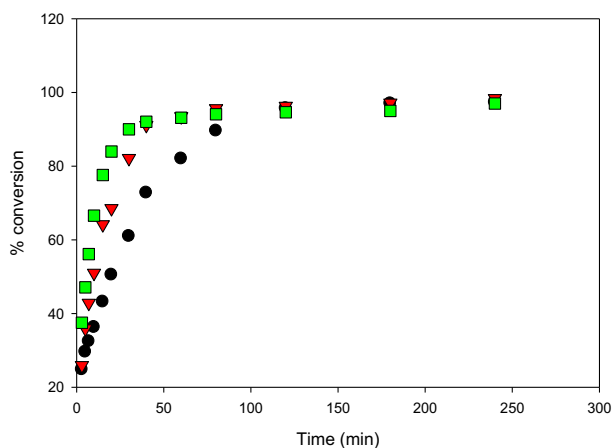

Figure S12. Conversion (%) vs. time for the ROP of LA initiated by **1** in  $\text{CH}_2\text{Cl}_2$  under the conditions in Table 2, entries 2, 3 and 5. **1 eq. BnOH**, **2 eq. BnOH**, **4 eq. BnOH**.

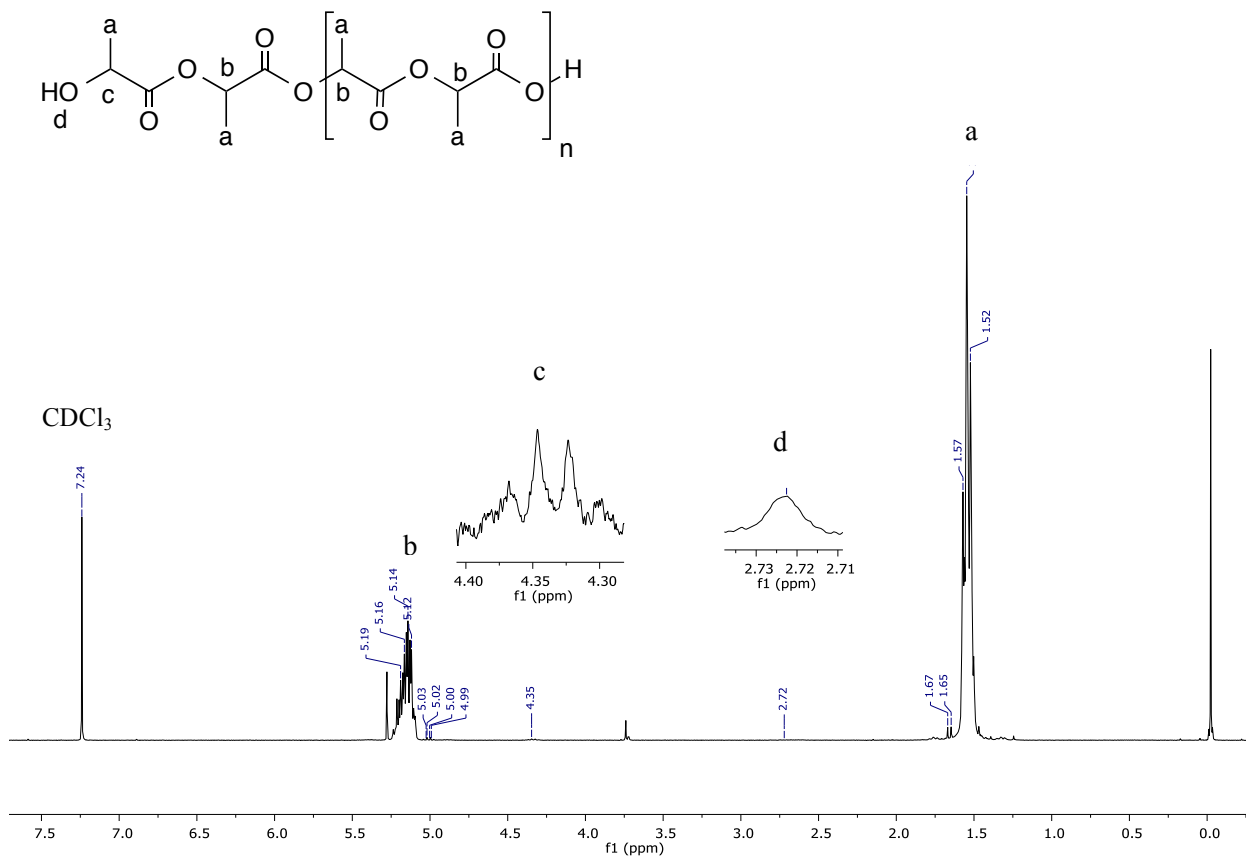

Figure S13.  $^1\text{H}$  NMR spectrum in  $\text{CDCl}_3$  of PLA obtained under the conditions in Table 2, entry 12, similar spectra also obtained for entries 13, 18 and 19.

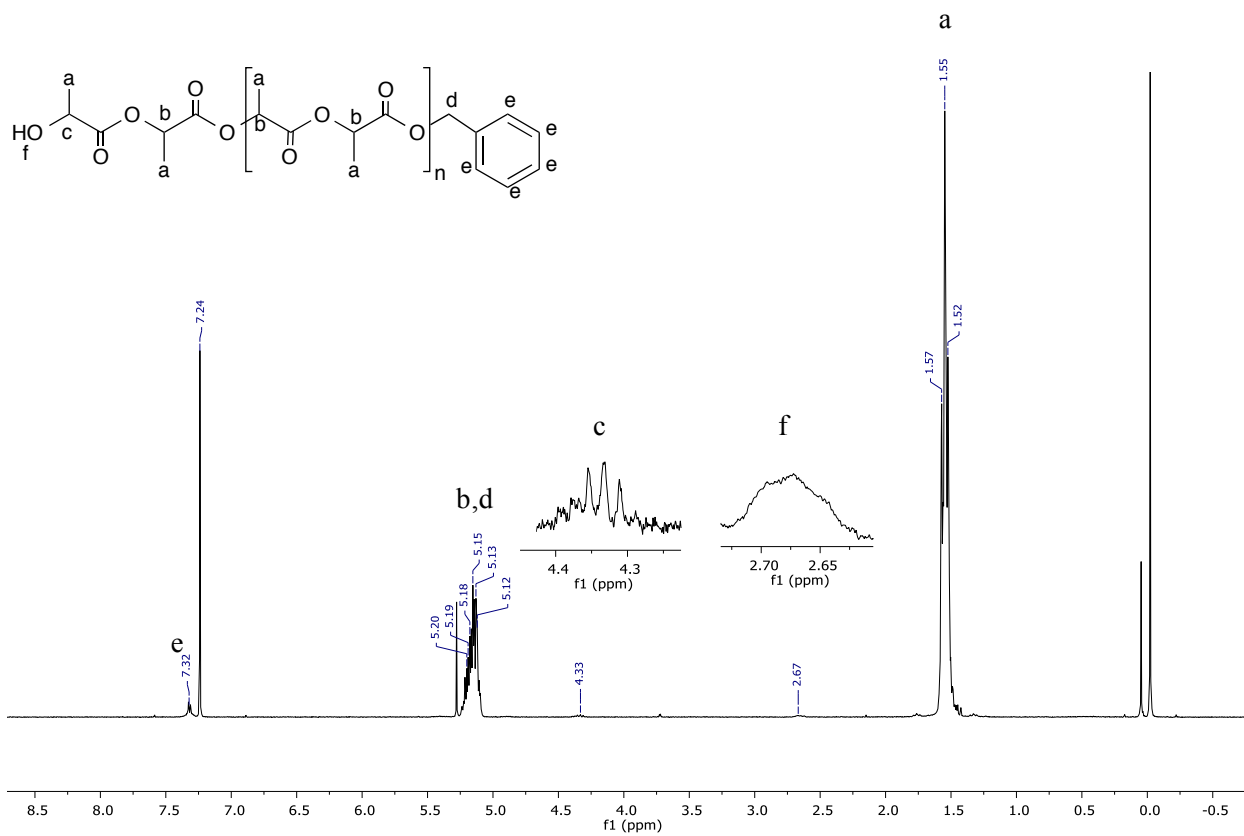

Figure S14. <sup>1</sup>H NMR spectrum in CDCl<sub>3</sub> of PLA obtained under the conditions in Table 2, entry 3, similar spectrum obtained for entry 5.



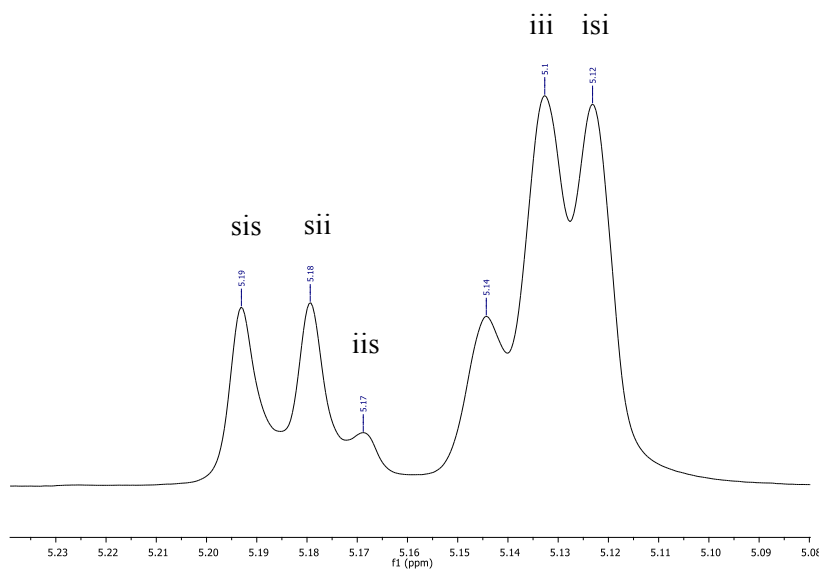

Figure S15.  $^1\text{H}\{^1\text{H}\}$  NMR spectrum (500 MHz,  $\text{CDCl}_3$ ) of the methine region of PLA produced under the conditions in Table 2, entry 7, similar results were obtained for entries 8, 12 and 13.

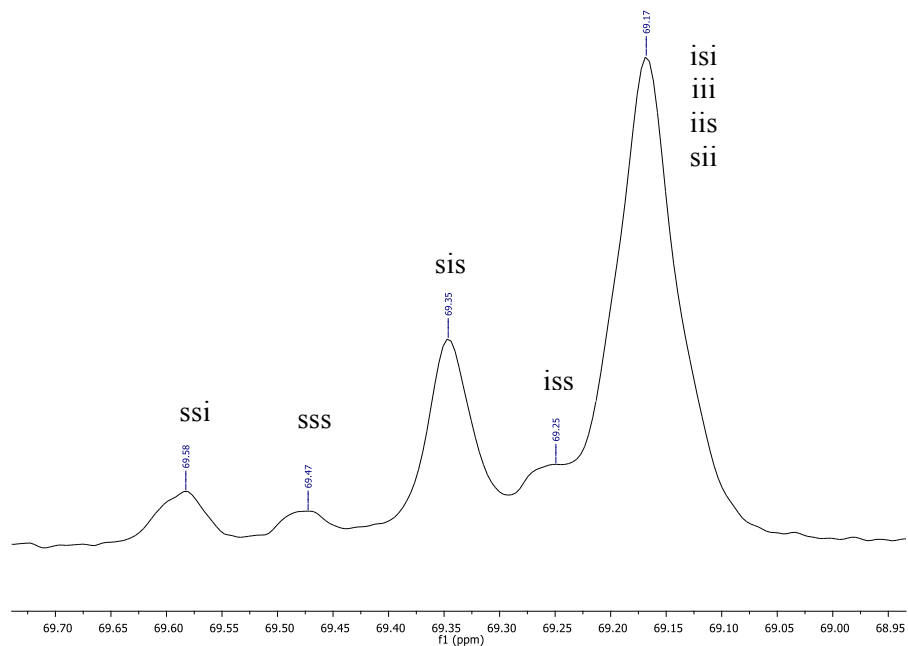

Figure S16.  $^{13}\text{C}$  NMR spectrum (500 MHz,  $\text{CDCl}_3$ ) of the methine region of PLA produced under the conditions in Table 2, entry 7, similar results were obtained for entries 8, 12 and 13.

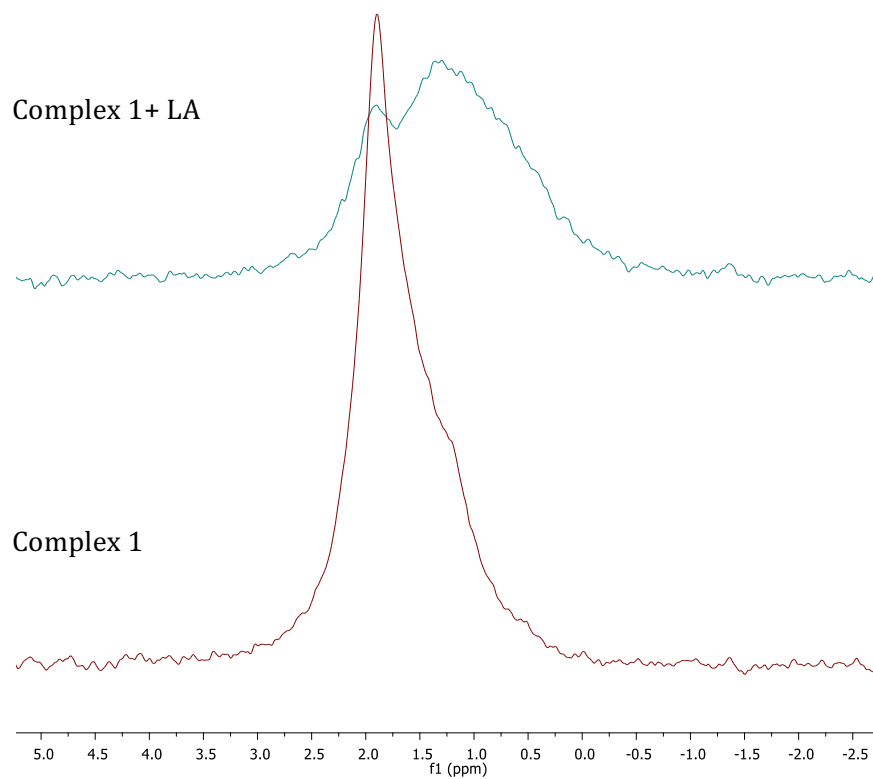

Figure S17.  $^7\text{Li}$  NMR spectrum (300 MHz,  $\text{C}_6\text{D}_6$ ) of **1** with and without 1 equiv. *rac*-lactide.

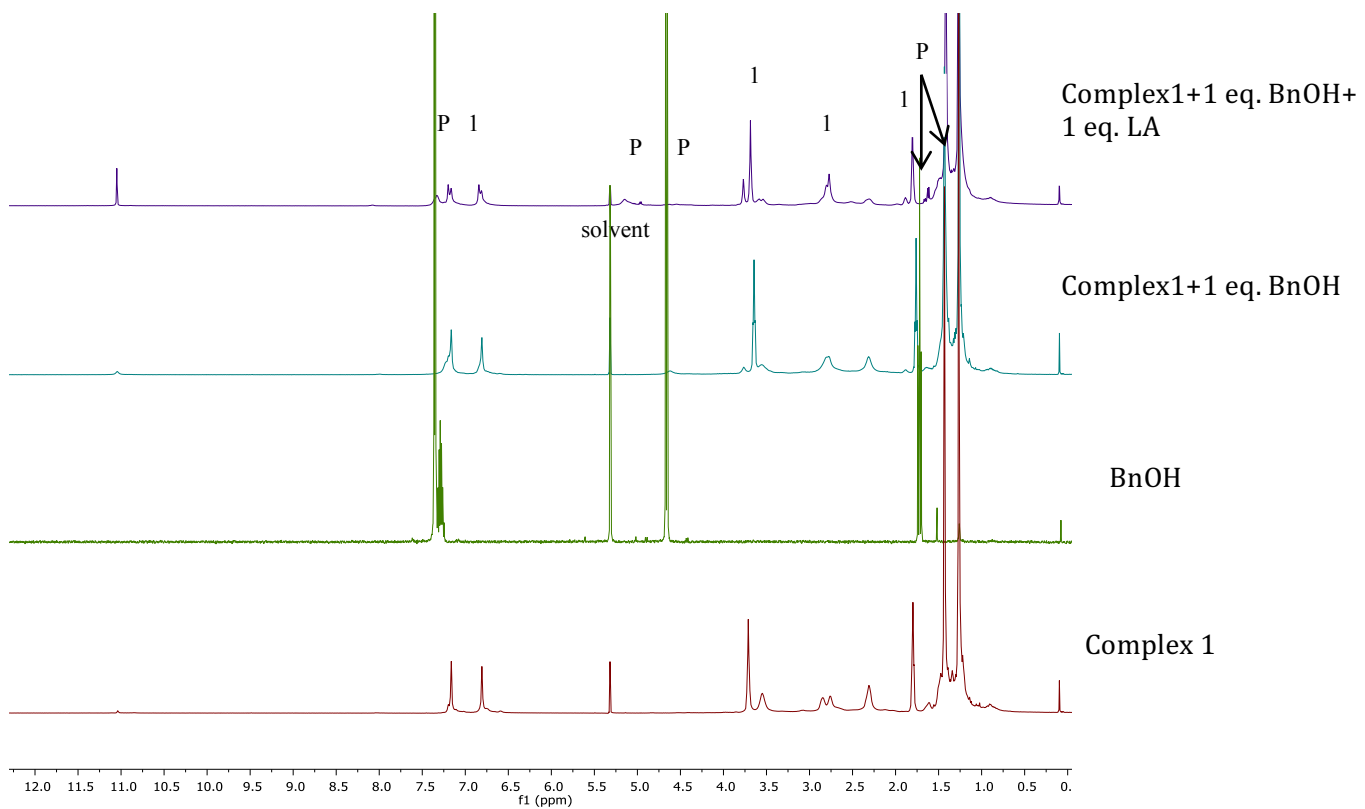

Figure S18. Monitoring of stoichiometric (M: BnOH: LA, 1:1 and 1:1:1) model reactions by  $^1\text{H}$  NMR in dichloromethane- $d_2$  at 298 K (500 MHz).

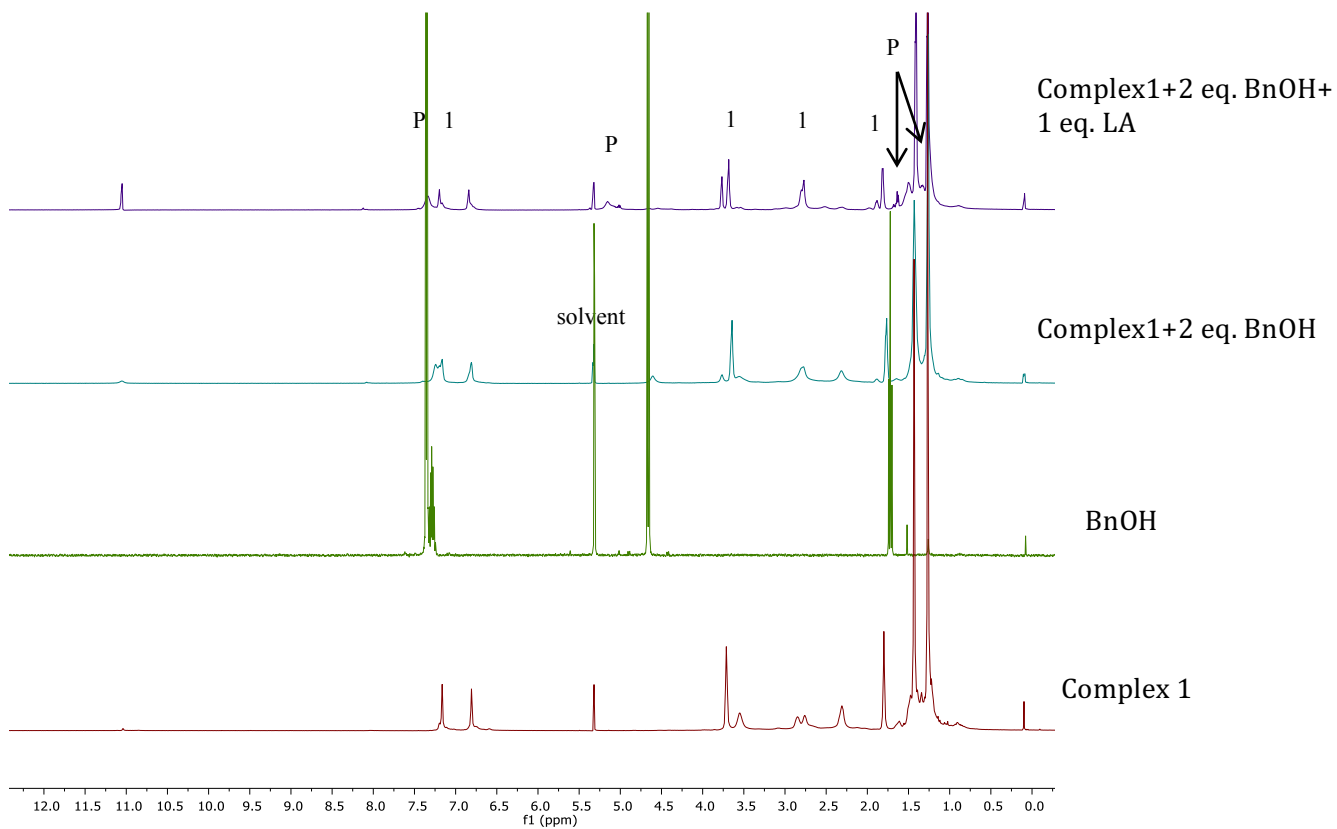

Figure S19. Monitoring of stoichiometric (M: BnOH: LA, 1:2 and 1:2:1) model reactions by  $^1\text{H}$  NMR in dichloromethane- $d_2$  at 298 K (500 MHz).

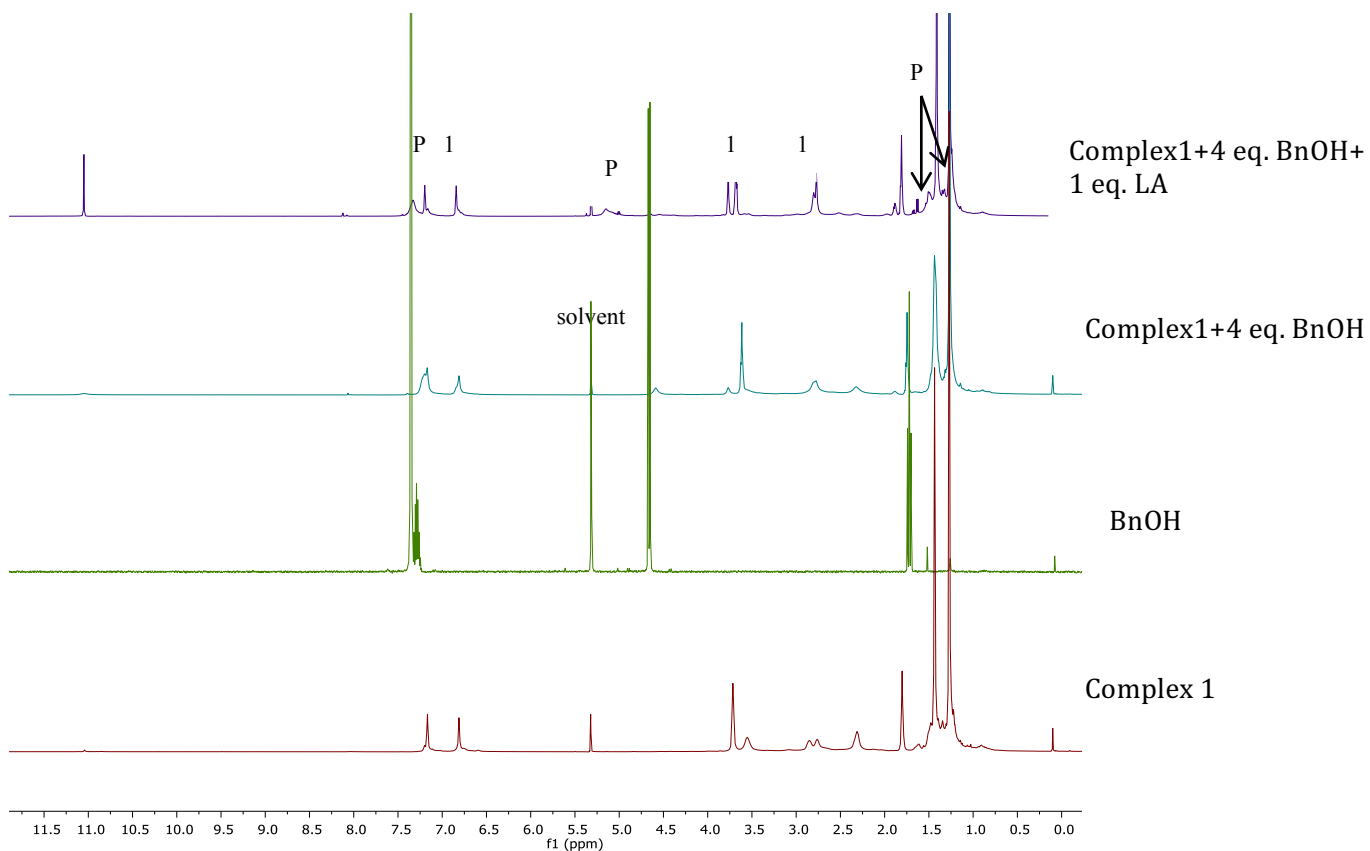

Figure S20. Monitoring of stoichiometric (M: BnOH: LA, 1:4 and 1:4:1) model reactions by  $^1\text{H}$  NMR in dichloromethane- $d_2$  at 298 K (500 MHz).

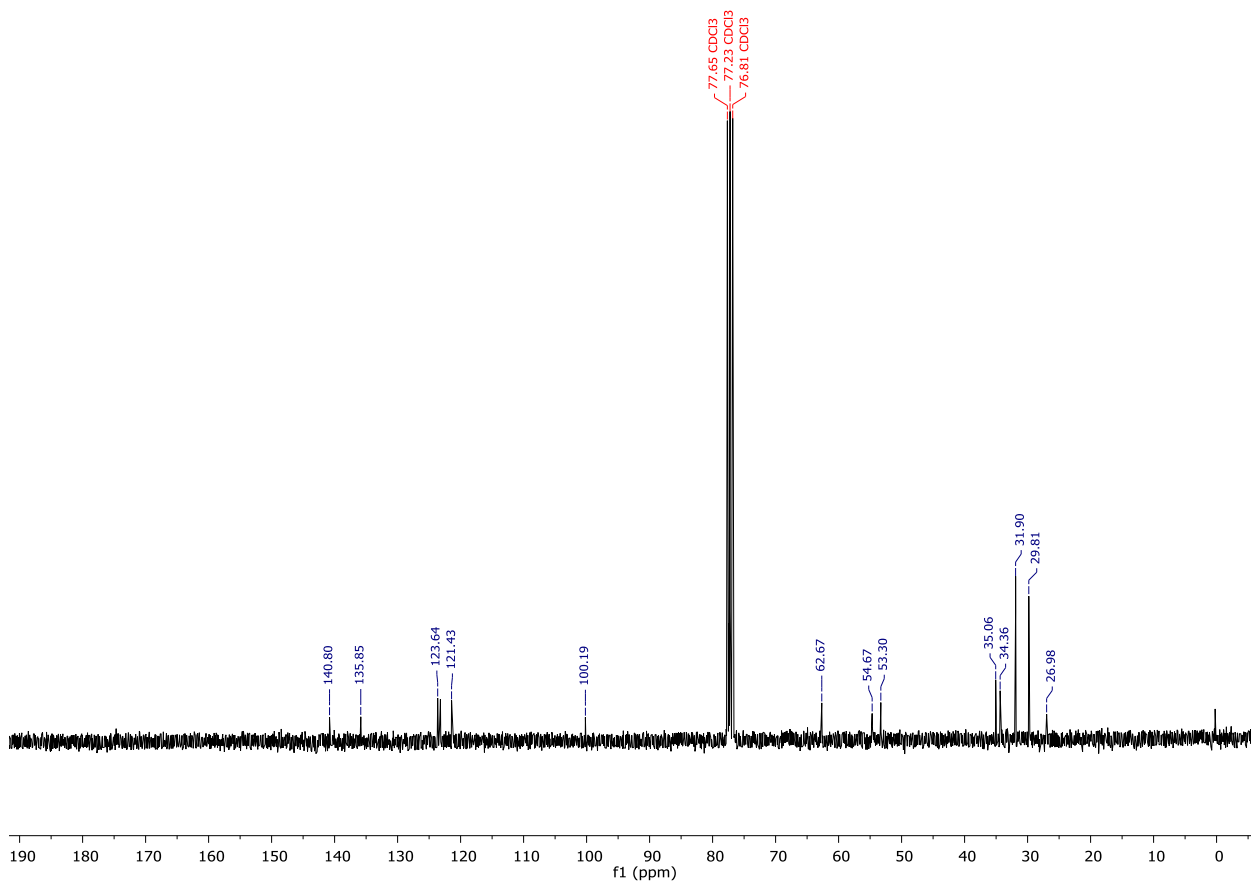

Figure S21.  $^{13}\text{C}$  NMR spectrum (300 MHz, 298 K,  $\text{CDCl}_3$ ) of **1**.

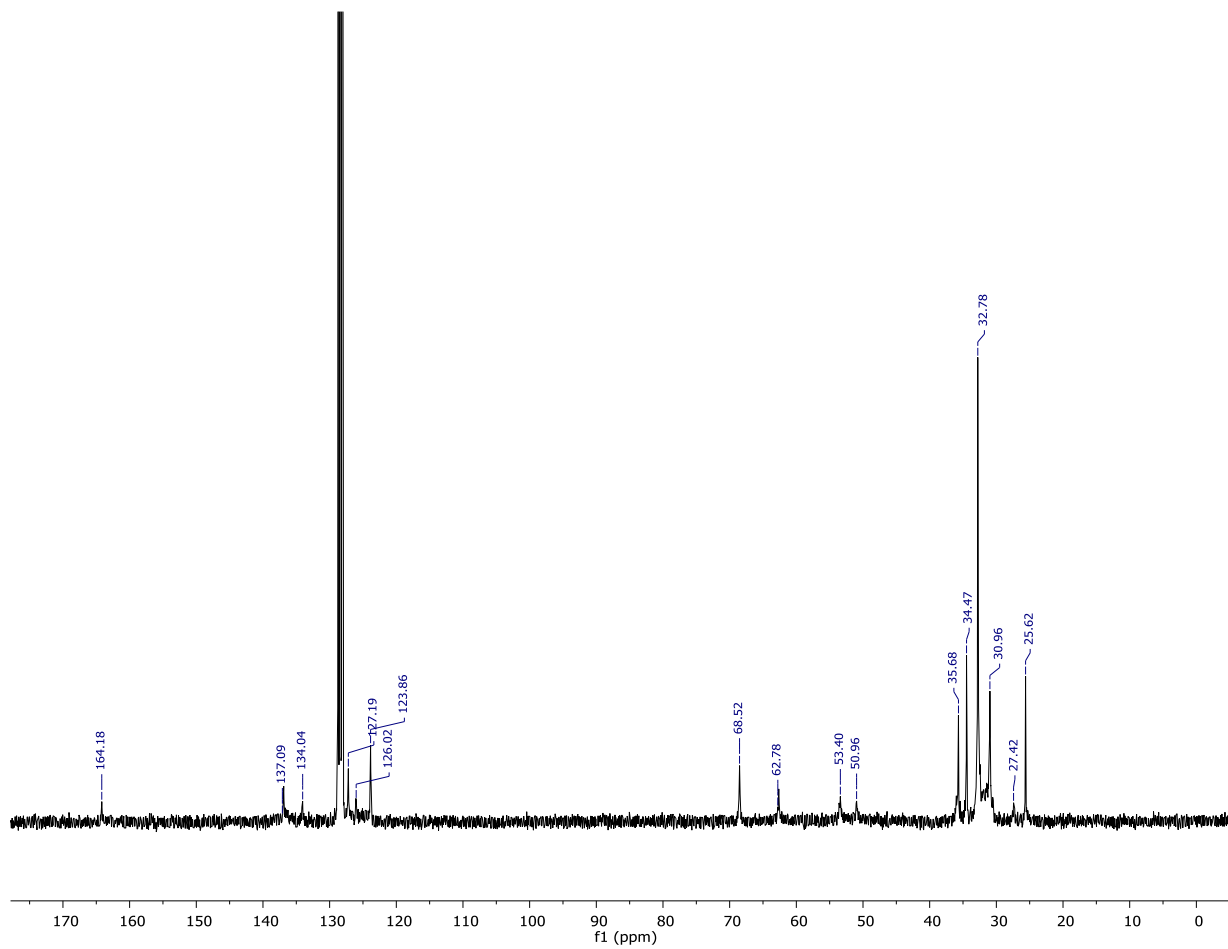

Figure S22.  $^{13}\text{C}$  NMR spectrum (300 MHz, 298 K,  $\text{C}_6\text{D}_6$ ) of **1**.

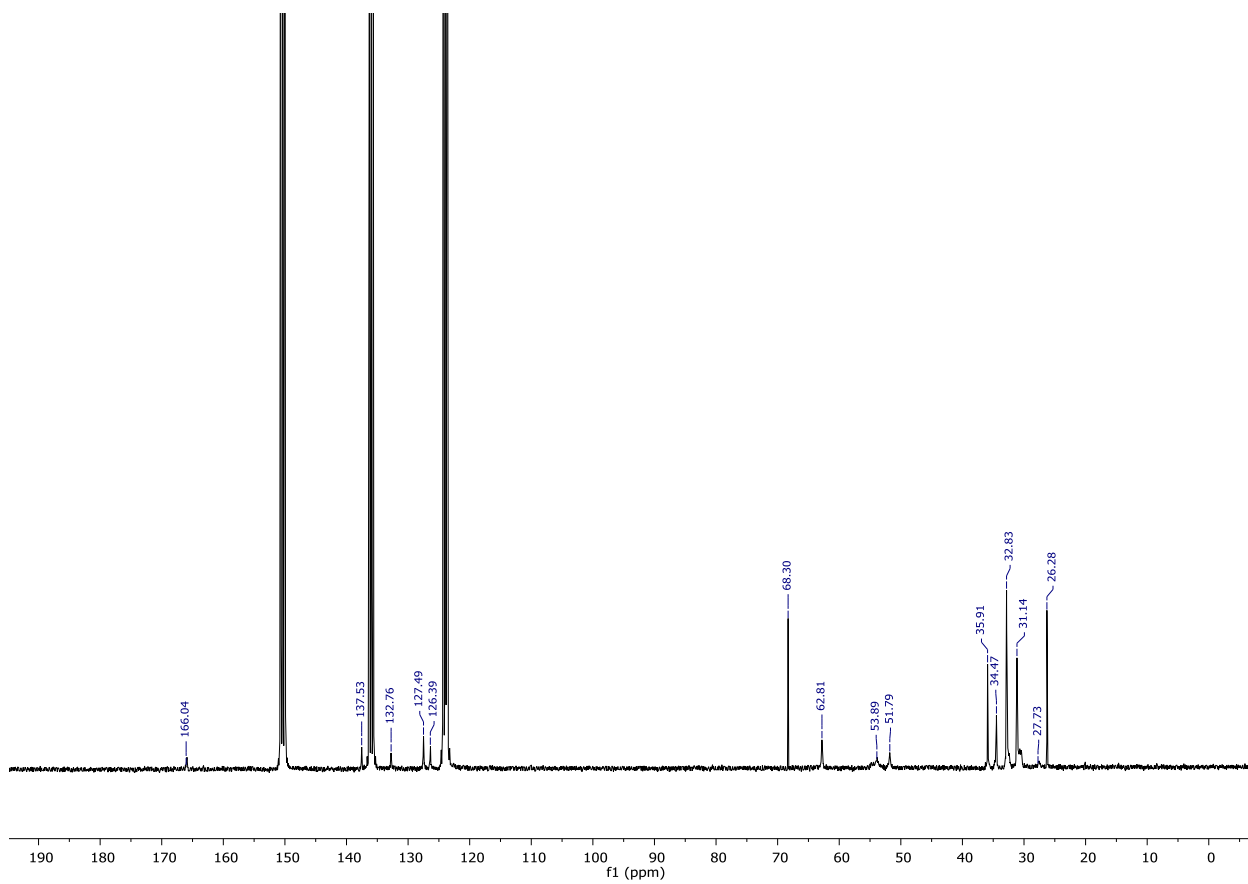

Figure S23.  $^{13}\text{C}$  NMR spectrum (300 MHz, 298 K,  $\text{C}_5\text{D}_5\text{N}$ ) of **1**.



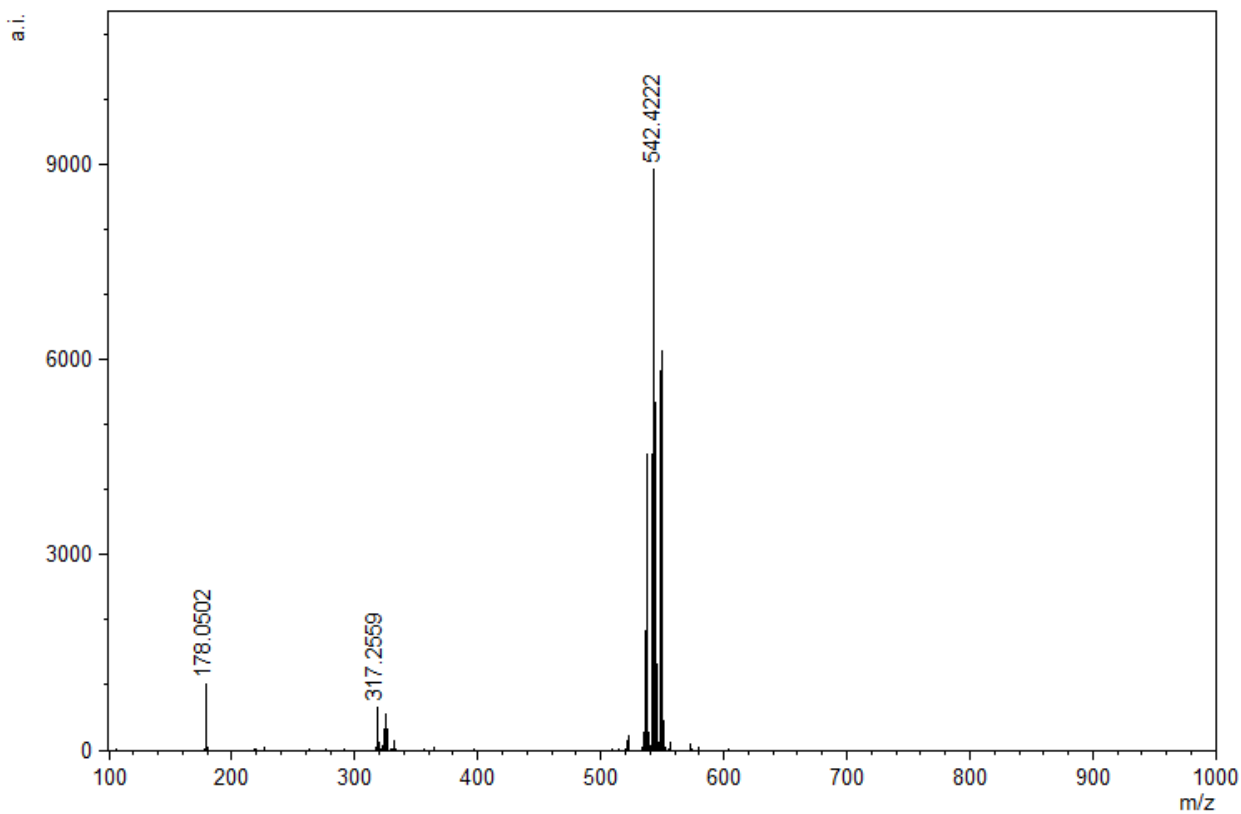

Figure S24. MALDI-TOF spectrum of **1**.

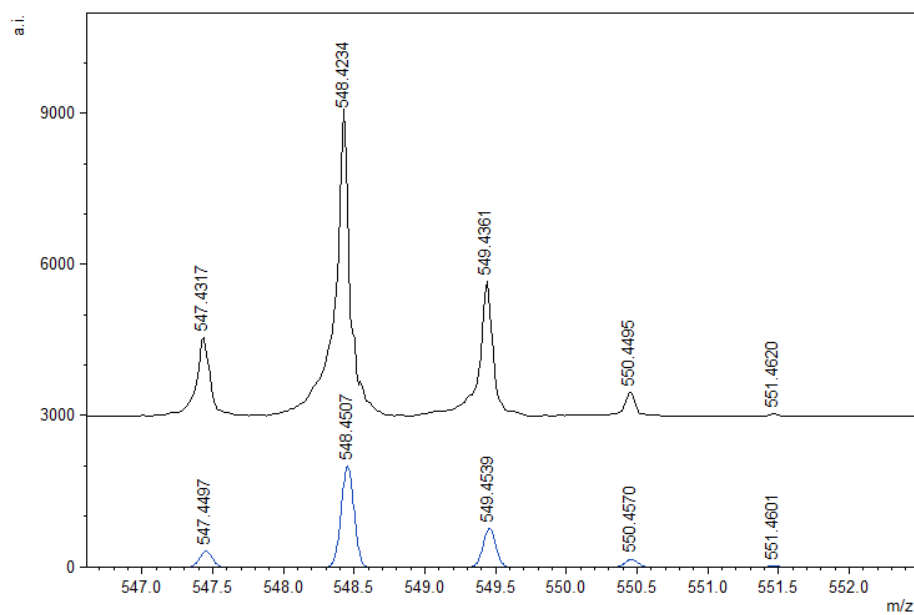

Figure S25. Theoretical and Experimental MALDI-TOF MS isotopic distribution pattern for **1**.

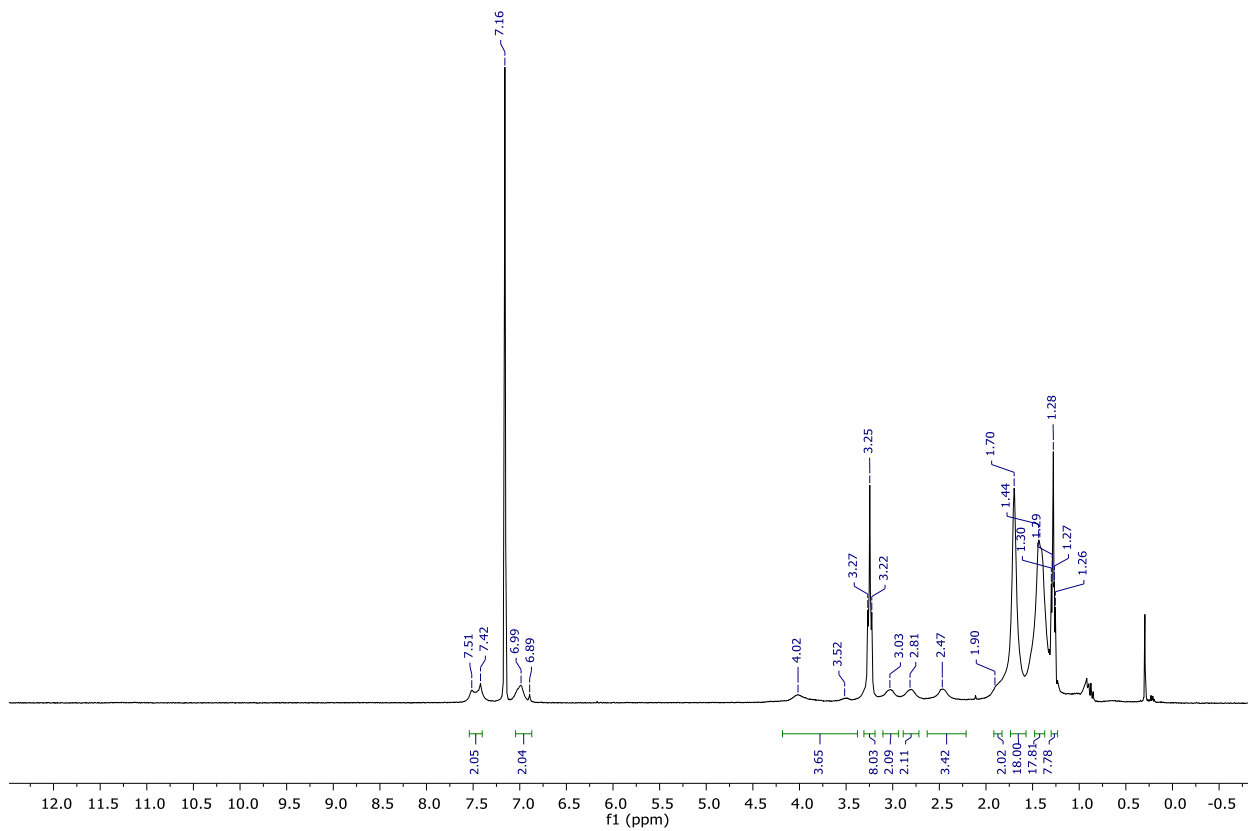

Figure S26.  $^1\text{H}$  NMR spectrum (300 MHz, 298 K,  $\text{C}_6\text{D}_6$ ) of **2**.

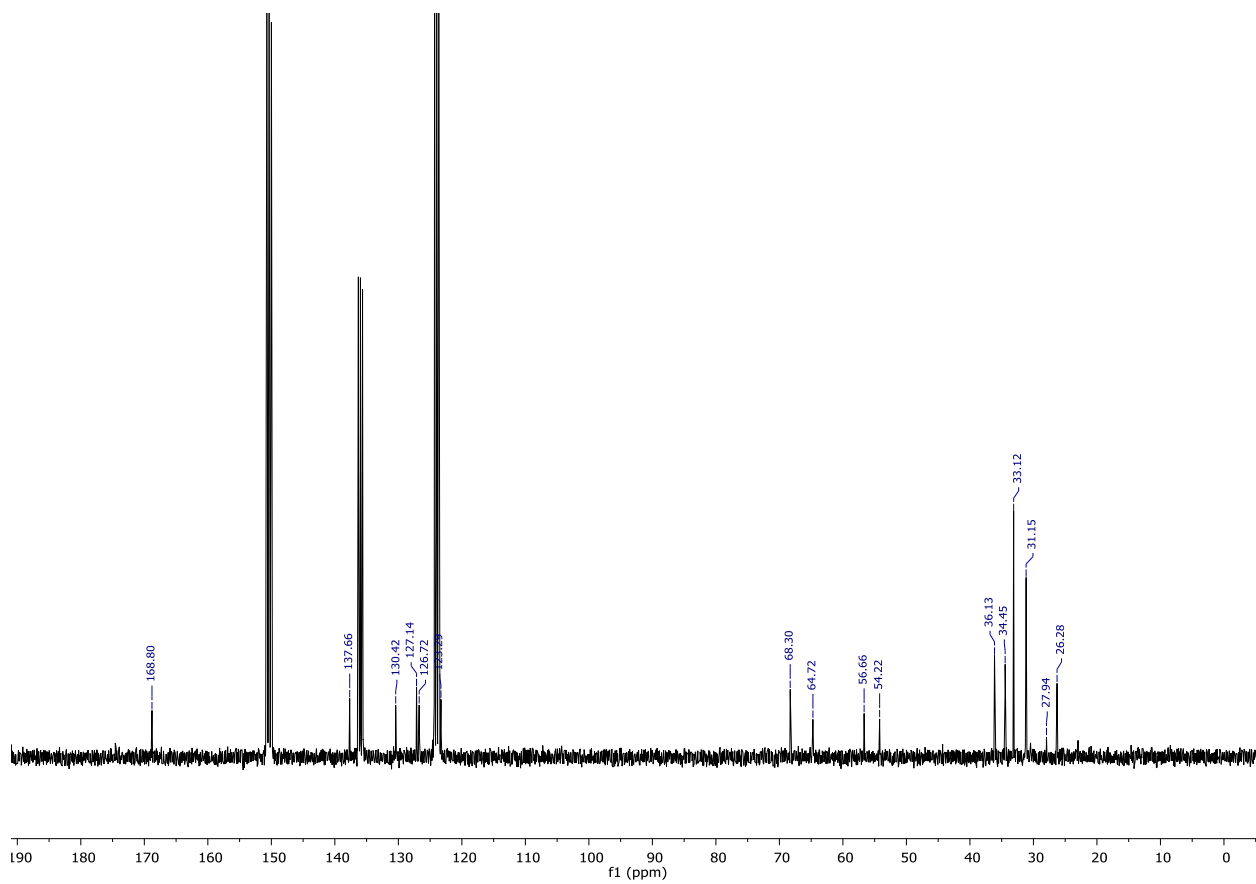

Figure S27.  $^{13}\text{C}$  NMR spectrum (300 MHz, 298 K,  $\text{C}_5\text{D}_5\text{N}$ ) of **2**.

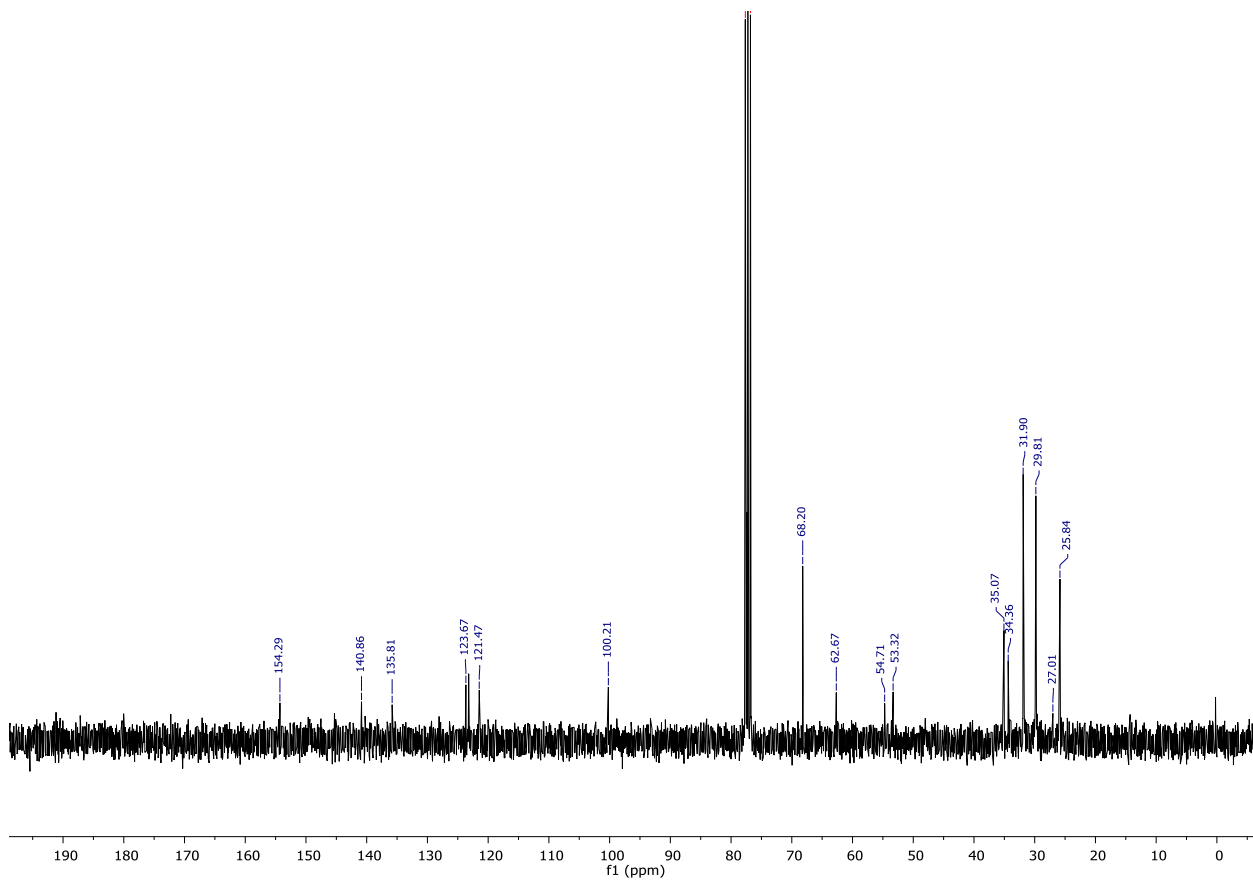

Figure S28.  $^{13}\text{C}$  NMR spectrum (300 MHz, 298 K,  $\text{CDCl}_3$ ) of **2**.

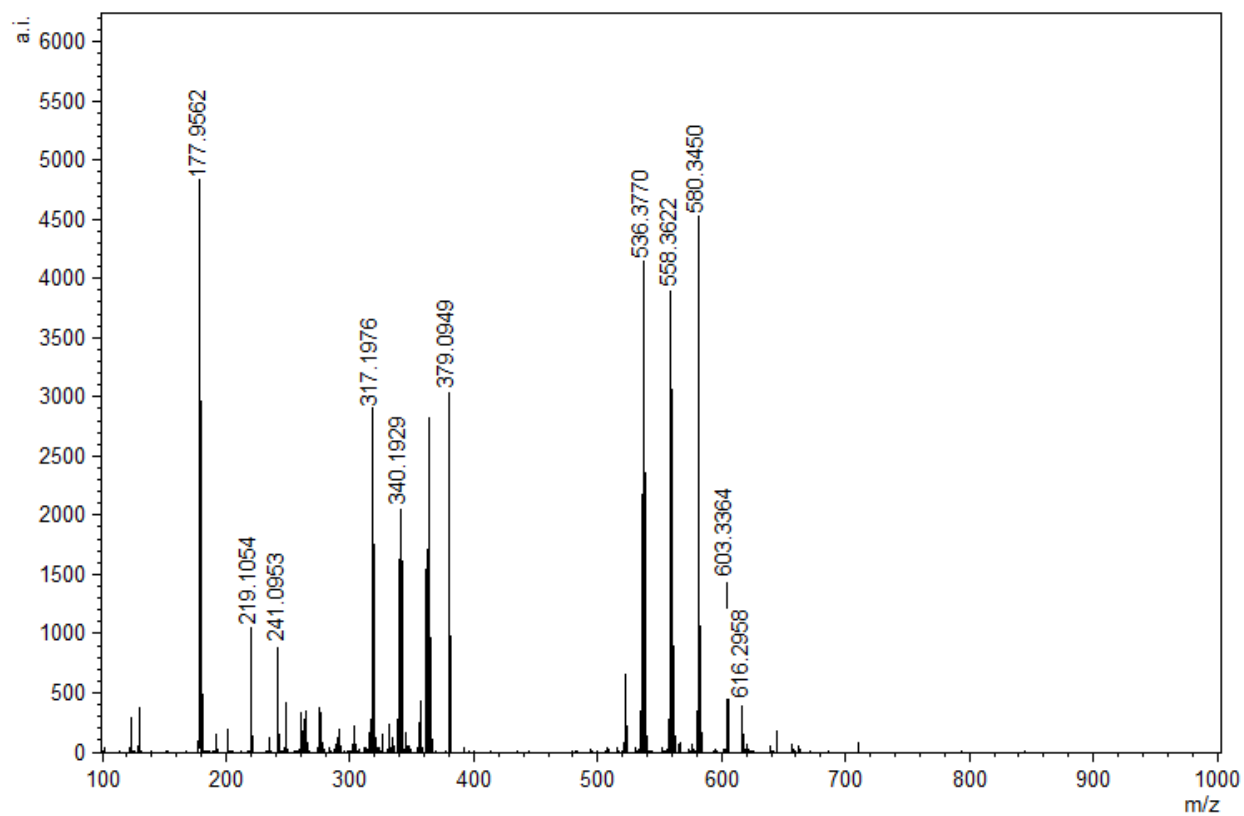

Figure S29. MALDI-TOF spectrum of **2**.

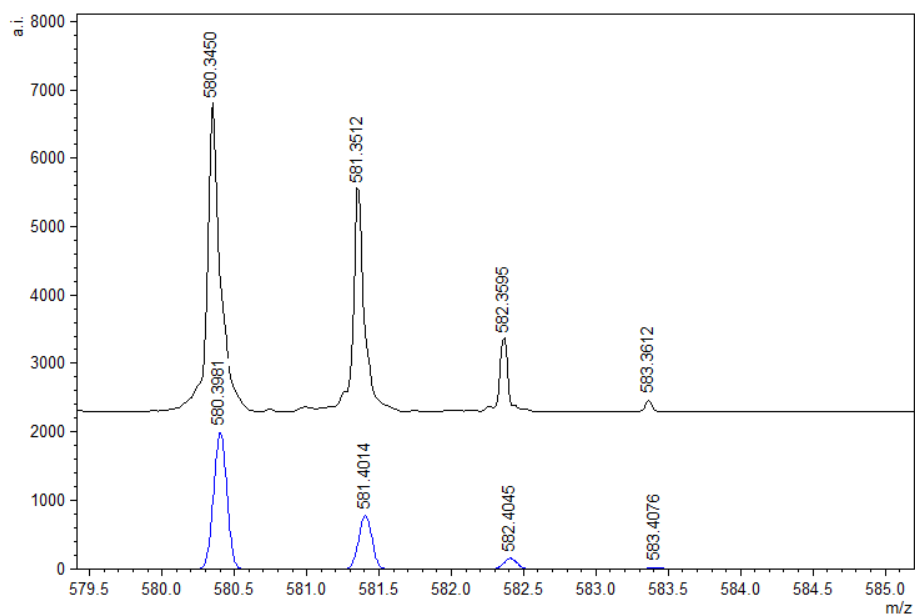

Figure S30. Theoretical and Experimental MALDI-TOF MS isotopic distribution pattern for **2**.

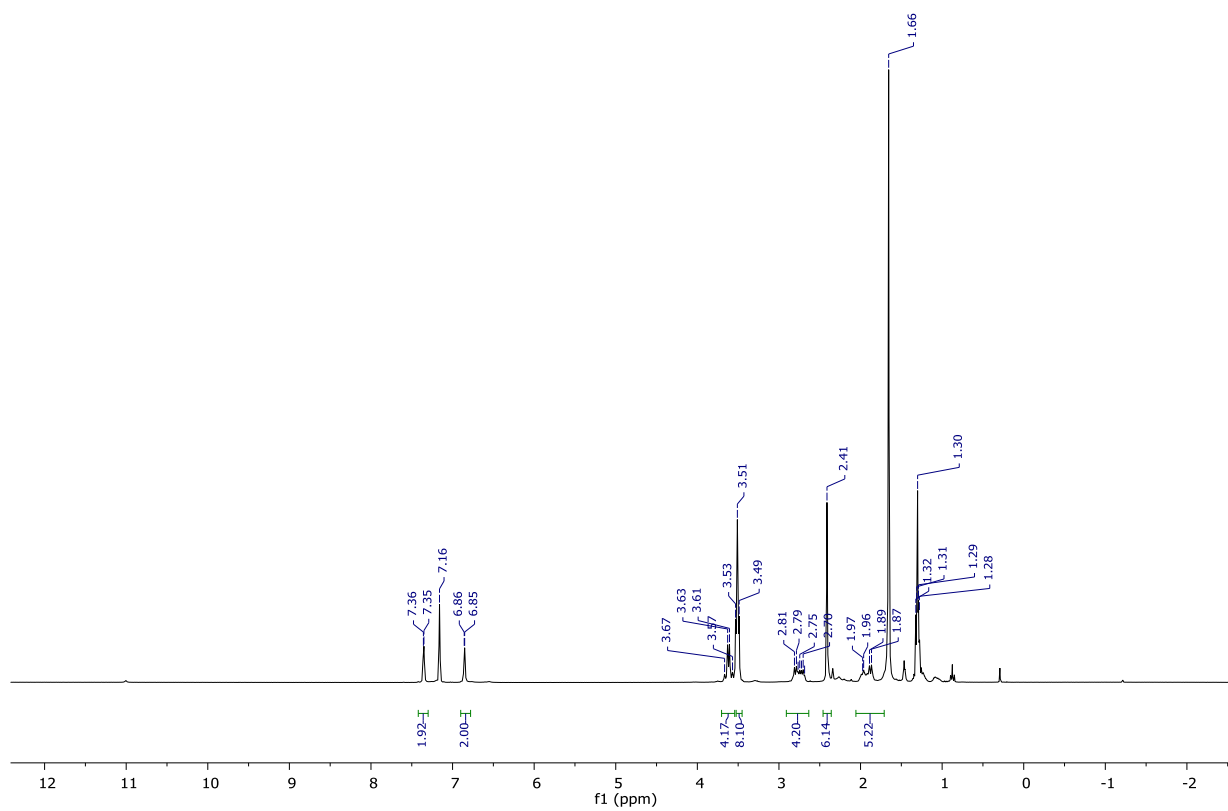

Figure S31.  $^1\text{H}$  NMR spectrum (300 MHz, 298 K,  $\text{C}_6\text{D}_6$ ) of **3**.

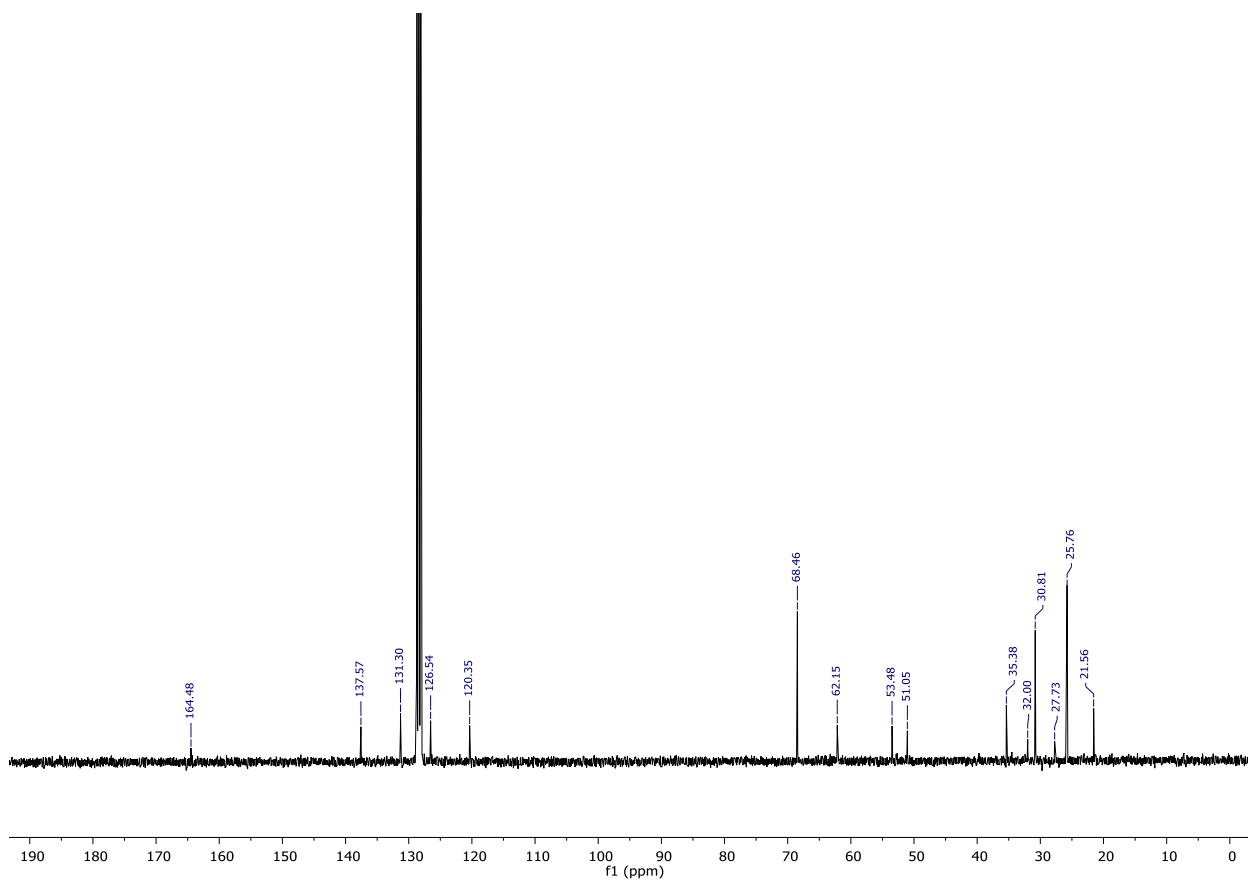

Figure S32.  $^{13}\text{C}$  NMR spectrum (300 MHz, 298 K,  $\text{C}_6\text{D}_6$ ) of **3**.

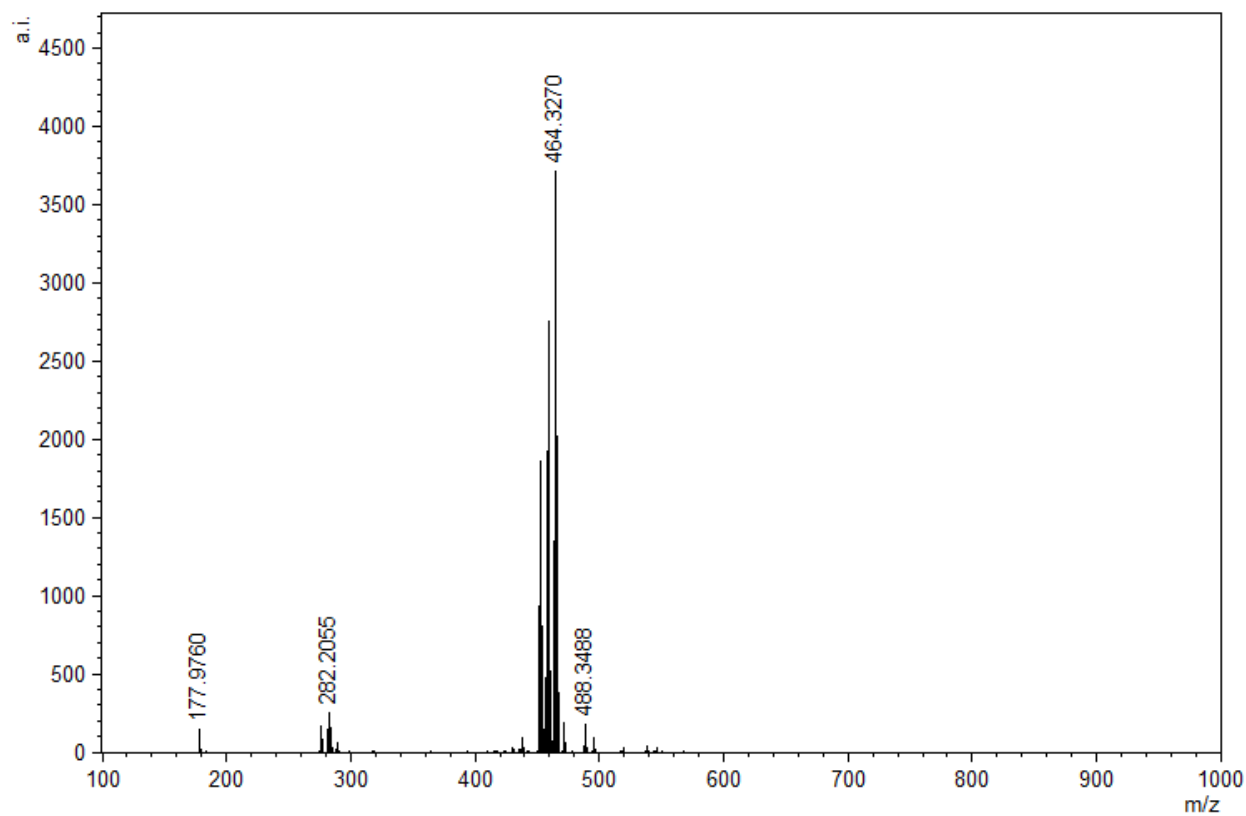

Figure S33. MALDI-TOF spectrum of **3**.

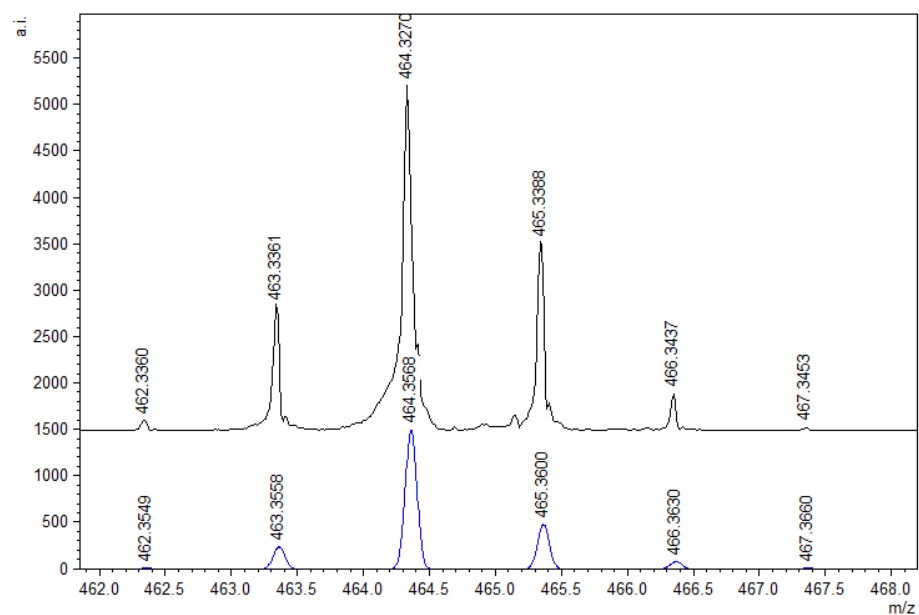

Figure S34. Theoretical and Experimental MALDI-TOF MS isotopic distribution pattern for **3**.



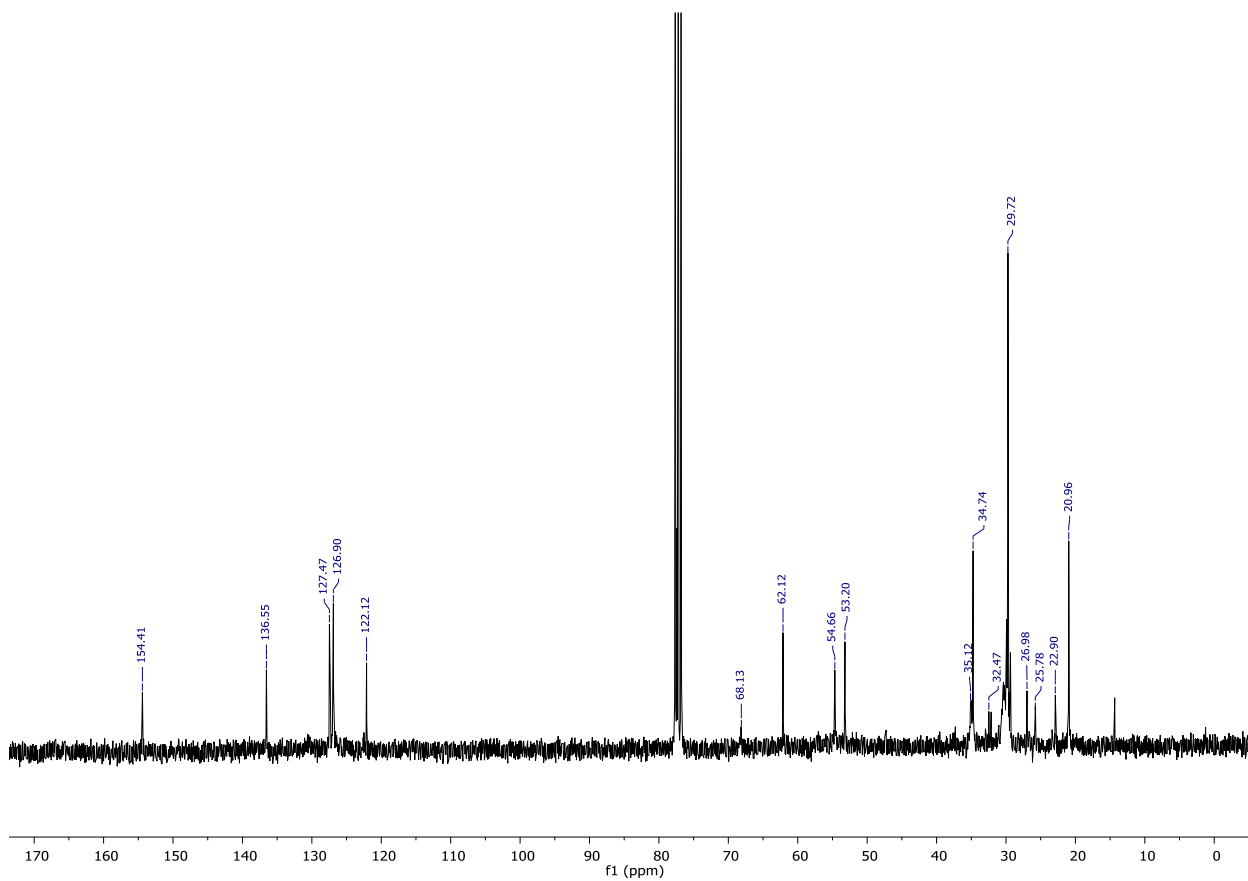

Figure S35.  $^{13}\text{C}$  NMR spectrum (300 MHz, 298 K,  $\text{CDCl}_3$ ) of 4.

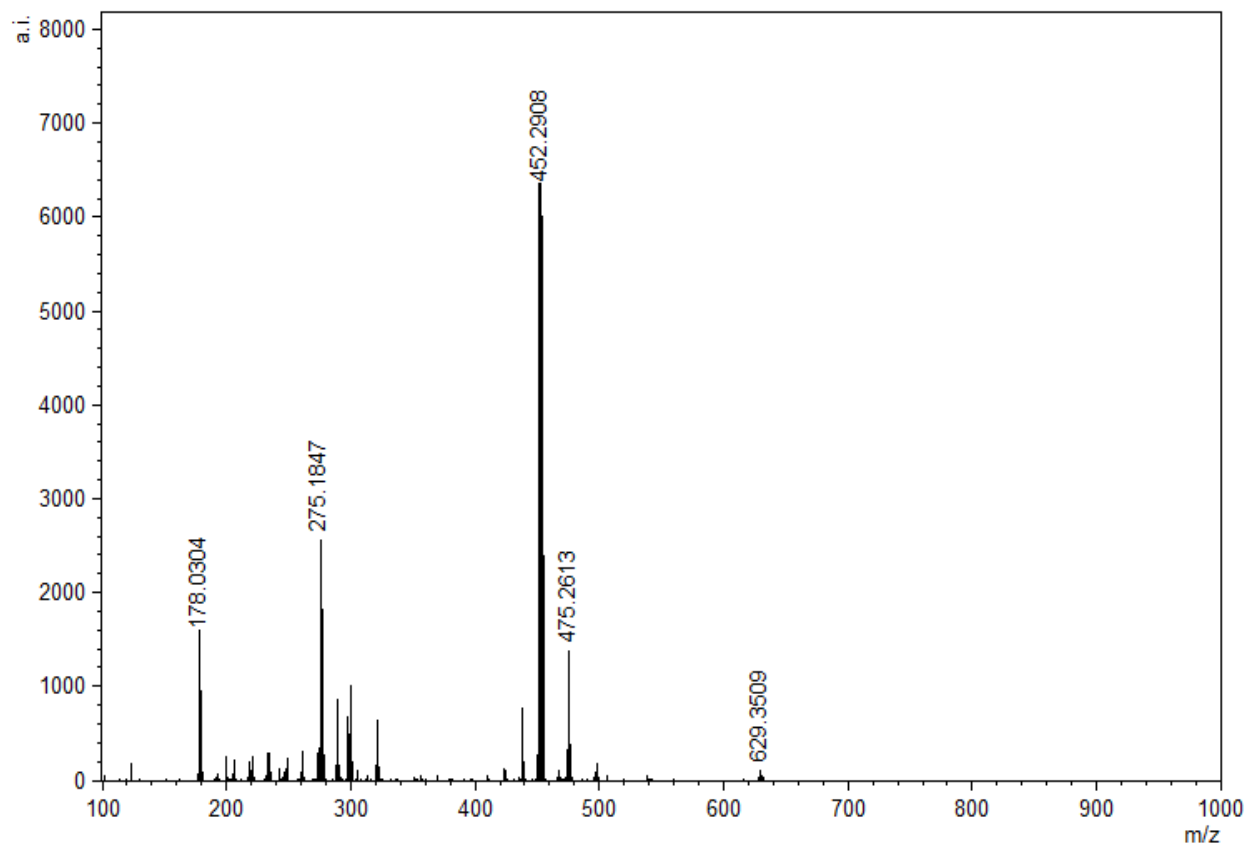

Figure S36. MALDI-TOF spectrum of **4**.
